# ANESTHESIOLOGY

## Historical and Modern Evidence for the Role of Reward Circuitry in Emergence

Mitra Heshmati, M.D., Ph.D., Michael R. Bruchas, Ph.D.

*ANESTHESIOLOGY* 2022; 136:997–1014

Emergence from general anesthesia is a dynamic time of transition from the anesthetized state to the awake state that continues to be an unpredictable and fragile period for patients in perioperative care.<sup>1–3</sup> Some evidence suggests that emergence is regulated by additional neural processes independent of drug clearance<sup>4–6</sup> and is not simply the reverse process of anesthetic induction, as described by models of anesthetic hysteresis.<sup>7–9</sup> Many surgical cases necessitate rapid arousal for assessment of patients' postoperative cognitive and motor abilities. Therefore, rapid and smooth emergence is desirable for both patient safety and perioperative efficiency. Why some patients emerge quickly from higher anesthetic concentrations than others and why subsets of patients undergo an agitated, combative state during the process of emergence is currently not well understood at multiple levels. Together, this unpredictability and the lack of an established therapy to facilitate emergence highlight the need for a better understanding of the basic neuropharmacologic mechanisms mediating emergence from anesthesia.

Emergence agitation can be dangerous, with patients manifesting combative behaviors that can result in self-injury, harm to providers, catheter removal, self-extubation, and airway obstruction. Postoperative delirium can also result in longer hospital length of stay and worsened clinical outcomes.<sup>10–12</sup> Efforts to mitigate adverse emergence phenomena, like agitation and delirium, are currently focused on avoiding inhalational anesthetics or supplementing inhalational agents with intravenous sedatives like the  $\alpha_2$  receptor agonist dexmedetomidine.<sup>13–18</sup>

### ABSTRACT

Increasing evidence supports a role for brain reward circuitry in modulating arousal along with emergence from anesthesia. Emergence remains an important frontier for investigation, since no drug exists in clinical practice to initiate rapid and smooth emergence. This review discusses clinical and preclinical evidence indicating a role for two brain regions classically considered integral components of the mesolimbic brain reward circuitry, the ventral tegmental area and the nucleus accumbens, in emergence from propofol and volatile anesthesia. Then there is a description of modern systems neuroscience approaches to neural circuit investigations that will help span the large gap between preclinical and clinical investigation with the shared aim of developing therapies to promote rapid emergence without agitation or delirium. This article proposes that neuroscientists include models of whole-brain network activity in future studies to inform the translational value of preclinical investigations and foster productive dialogues with clinician anesthesiologists.

(*ANESTHESIOLOGY* 2022; 136:997–1014)

However, the results from these studies vary widely with patient population,<sup>19,20</sup> and the basic neuronal mechanisms modulating emergence under different anesthetic conditions are still unclear. Mechanisms of emergence from volatile or propofol anesthesia, which can directly bind to  $\gamma$ -aminobutyric acid (GABA) receptors, can be inconsistent with mechanisms found to mediate the effects of ketamine, which blocks glutamatergic neurotransmission.<sup>21,22</sup> However, common anesthetic substrates in the brain exist, such as the activation of hypothalamic neurons.<sup>23</sup> Here, we will focus our discussion on studies that use propofol, sevoflurane, or isoflurane for maintenance of general anesthesia, since they form much of the literature investigating mesolimbic circuitry in emergence. Further mechanistic basic science research is needed to examine whether findings hold true across disparate anesthetic conditions. There is a clinical need for therapeutic interventions targeting emergence and the postanesthetic period to improve the predictability, speed, and safety of anesthesia care. By prioritizing a translational and multidisciplinary approach, basic neuroscientists can help to uncover these gaps in knowledge.

Decades of accumulating literature support a role for dopaminergic signaling through the brain reward circuitry in promoting arousal (see reviews<sup>24–26</sup>). Here, we summarize key clinical and preclinical evidence supporting a central role for the brain's mesolimbic dopaminergic reward circuitry in modulating emergence from general propofol and volatile anesthesia, with a focus on the ventral tegmental area and

Submitted for publication September 5, 2021. Accepted for publication January 20, 2022. Published online first on March 31, 2022.

Mitra Heshmati, M.D., Ph.D.: Center for the Neurobiology of Addiction, Pain, and Emotion, Department of Anesthesiology and Pain Medicine, and Department of Biological Structure, University of Washington, Seattle, Washington.

Michael R. Bruchas, Ph.D.: Center for the Neurobiology of Addiction, Pain, and Emotion, Department of Anesthesiology and Pain Medicine, and Department of Pharmacology, University of Washington, Seattle, Washington.

Copyright © 2022, the American Society of Anesthesiologists. All Rights Reserved. *Anesthesiology* 2022; 136:997–1014. DOI: 10.1097/ALN.0000000000004148

the nucleus accumbens regions. The same neural circuitry may be important for the pathophysiology of emergence agitation, given the essential role of reward circuitry in regulating emotional and arousal-related behavioral states. We then discuss systems neuroscience approaches for bridging preclinical and clinical studies of brain reward circuitry in emergence to promote the therapeutic application of pre-clinical investigations (fig. 1).

Until recently, high-resolution approaches for careful examination within the intact brain did not exist to enable discrete cell type- and region-specific investigations of circuit dynamics. However, now we can harness viral-mediated and genetic approaches to deliver engineered

photoactivatable compounds and perform whole-brain imaging at single-cell resolution. This more intricate systems neuroscience approach can be used to understand brain circuitry in preclinical models of awake, behaving rodents and even nonhuman primates.<sup>27–30</sup> To place the granularity of these investigations in a clinically useful framework, mechanistic cellular-level studies must then be examined in the context of changes to whole-brain activity.

While there is a broad and vast literature describing the role of dopaminergic circuitry in mediating arousal and reward-reinforcing behaviors, this review is limited to systems neuroscience studies of particular relevance to the clinical practicing anesthesiologist (table 1). We also refer

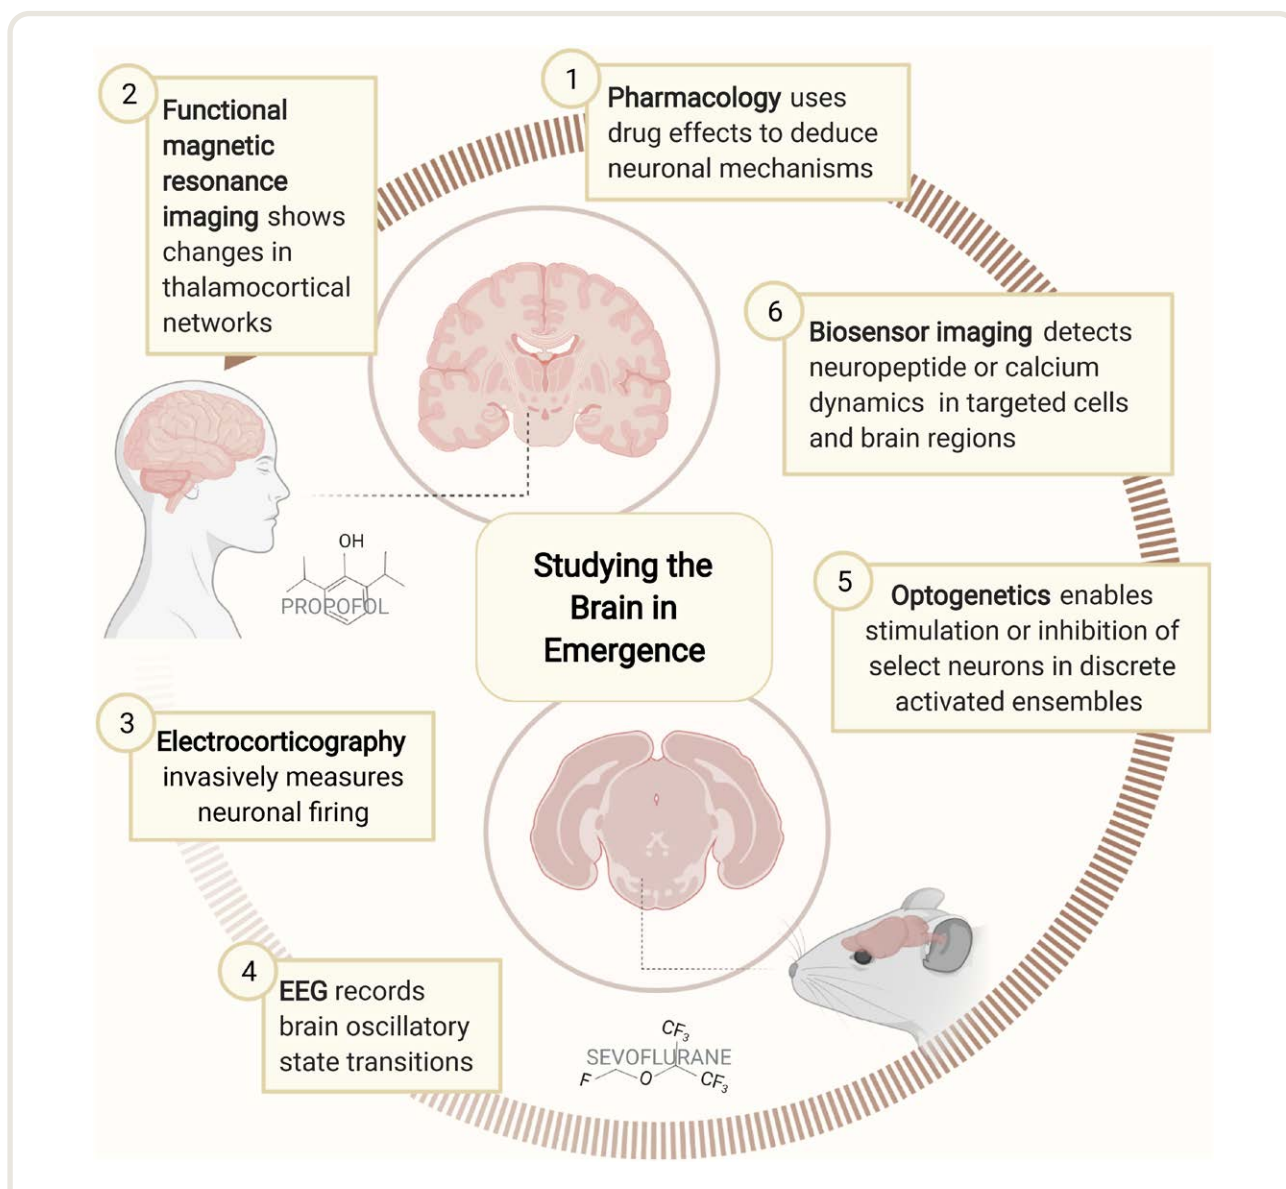

**Fig. 1.** Schematic highlighting the need to bridge the gap between preclinical and clinical studies of anesthesia emergence with translational research. The numbered boxes highlight common methodologies in either clinical or preclinical research. The insets show midbrain slices from the human and mouse brain, as well as the chemical structures of propofol and sevoflurane, two of the most common anesthetics under investigation. The figure was created with BioRender.com. EEG, electroencephalogram.

**Table 1.** Selected List of Historical References, Primary Preclinical Articles Investigating the Role of Mesolimbic Circuitry in Emergence, and Suggested Literature Reviews on Emergence

| Citation                                           | Brain Region/Neurotransmitter                              | Anesthetic                                                        | Species       | Major Finding                                                                                                             |
|----------------------------------------------------|------------------------------------------------------------|-------------------------------------------------------------------|---------------|---------------------------------------------------------------------------------------------------------------------------|
| <b>Historical references</b>                       |                                                            |                                                                   |               |                                                                                                                           |
| Eckenhoff <i>et al.</i> (1961) <sup>1</sup>        |                                                            | Thiopental, halothane, ether, cyclopropane, nitrous oxide, spinal | Human         | First descriptions of “emergence excitement” and differential effects of anesthetic drug treatment in 14,436 patients     |
| Mantz <i>et al.</i> (1994) <sup>31</sup>           | Striatum/dopamine                                          | Halothane, isoflurane, thiopental, ketamine                       | Rat           | Anesthetics significantly alter spontaneous and evoked dopamine release in striatal synaptosomes                          |
| Irfune <i>et al.</i> (1997) <sup>32</sup>          | Nucleus accumbens/dopamine                                 | Isoflurane                                                        | Mouse         | HPLC assays show increased dopamine turnover, hyperlocomotion during emergence                                            |
| Tsukada <i>et al.</i> (1999) <sup>33</sup>         | Striatum/dopamine                                          | Isoflurane                                                        | Rhesus monkey | Positron emission tomography and microdialysis show enhanced DAT inhibition and D2 receptor binding under isoflurane      |
| Fiset <i>et al.</i> (1999) <sup>34</sup>           | Medial thalamus, midbrain                                  | Propofol                                                          | Human         | Positron emission tomography shows cerebral blood flow changes in midbrain and thalamus                                   |
| <b>Brain region-specific manipulations</b>         |                                                            |                                                                   |               |                                                                                                                           |
| Kelz <i>et al.</i> (2008) <sup>35</sup>            | Hypothalamus/orexin                                        | Isoflurane, sevoflurane                                           | Mouse         | Ablation of orexinergic neurons or an orexin-1 antagonist delays emergence, not induction                                 |
| Mhuirheartaigh <i>et al.</i> (2010) <sup>36</sup>  | Putamen, thalamus, cortex                                  | Propofol                                                          | Human         | Functional magnetic resonance imaging blood-oxygen-level-dependent imaging shows changes in subcortical connectivity      |
| Shirasaka <i>et al.</i> (2011) <sup>37</sup>       | Prefrontal cortex/orexin                                   | Propofol                                                          | Rat           | ICV injection of orexin speeds emergence, increases norepinephrine and dopamine release in the prefrontal cortex          |
| Solt <i>et al.</i> (2014) <sup>38</sup>            | Ventral tegmental area, substantia nigra/dopamine?         | Isoflurane, propofol                                              | Rat           | Electrical stimulation of the ventral tegmental area speeds emergence                                                     |
| McCarren <i>et al.</i> (2014) <sup>39</sup>        | Ventrolateral preoptic nucleus/norepinephrine              | Isoflurane, dexmedetomidine                                       | Mouse         | Single-cell reverse transcription-polymerase chain reaction of VLPO neurons and role of adrenergic manipulation           |
| Vazey and Aston-Jones (2014) <sup>40</sup>         | Locus coeruleus/norepinephrine                             | Isoflurane                                                        | Rat           | Chemogenetic activation of locus coeruleus neurons speeds emergence                                                       |
| Zhou <i>et al.</i> (2015) <sup>41</sup>            | Ventral tegmental area/dopamine                            | Propofol, isoflurane, ketamine                                    | Rat           | Lesioning ventral tegmental area dopamine neurons with 6-hydroxydopamine prolongs emergence from propofol, not isoflurane |
| Taylor <i>et al.</i> (2016) <sup>42</sup>          | Ventral tegmental area/dopamine                            | Isoflurane                                                        | Mouse         | Optogenetic activation of ventral tegmental area dopamine neurons speeds emergence                                        |
| Muindi <i>et al.</i> (2016) <sup>21</sup>          | Parabrachial nucleus/glutamate?                            | Isoflurane                                                        | Mouse         | Electrical stimulation of parabrachial nucleus speeds emergence                                                           |
| Fu <i>et al.</i> (2017) <sup>43</sup>              | Central medial thalamus/norepinephrine                     | Propofol                                                          | Rat           | Norepinephrine microinjection in central medial thalamus speeds emergence                                                 |
| Du <i>et al.</i> (2018) <sup>44</sup>              | Locus coeruleus/norepinephrine                             | Propofol, etomidate                                               | Zebrafish     | Deletion of dopamine- $\beta$ -hydroxylase in locus coeruleus neurons delays emergence from intravenous anesthesia        |
| Yin <i>et al.</i> (2019) <sup>45</sup>             | Ventral tegmental area, hypothalamus/GABA                  | Isoflurane                                                        | Mouse         | Activation of ventral tegmental area GABA to hypothalamus slows emergence                                                 |
| Wang <i>et al.</i> (2019) <sup>46</sup>            | Parabrachial nucleus/glutamate                             | Sevoflurane                                                       | Mouse         | Activation of parabrachial nucleus glutamate neurons speeds emergence                                                     |
| Zhang <i>et al.</i> (2019) <sup>47</sup>           | Reticular thalamus/norepinephrine                          | Propofol                                                          | Mouse         | Locus coeruleus-to-TRN norepinephrine projections delay emergency by activating $\alpha$ 1 adrenergic receptor            |
| Torturo <i>et al.</i> (2019) <sup>48</sup>         | Ventral tegmental area/dopamine                            | Isoflurane                                                        | Rat           | Isoflurane inhibits exocytosis in cultured rat dopamine neurons by a distinct calcium-mediated mechanism                  |
| Li <i>et al.</i> (2019) <sup>49</sup>              | Ventral tegmental area/orexin                              | Isoflurane                                                        | Rat           | Microinjection of orexin in the ventral tegmental area promotes emergence by activating dopamine neurons                  |
| Zhang <i>et al.</i> (2020) <sup>50</sup>           | Prefrontal cortex/acetylcholine, adenosine, norepinephrine | Isoflurane                                                        | Mouse         | Microdialysis studies showing neurotransmitter roles in anesthetized-to-awake state transition                            |
| Luo <i>et al.</i> (2020) <sup>51</sup>             | Basal forebrain/acetylcholine                              | Isoflurane, propofol                                              | Mouse         | Chemogenetic activation of cholinergic neurons speeds emergence                                                           |
| Gretenkord <i>et al.</i> (2020) <sup>52</sup>      | Ventral tegmental area, prefrontal cortex/dopamine         | Urethane                                                          | Rat           | Stimulation of ventral tegmental area and D1 receptors in prefrontal cortex promotes arousal                              |
| Ao <i>et al.</i> (2021) <sup>53</sup>              | Paraventricular thalamus/dopamine                          | Isoflurane                                                        | Mouse         | PVT cFos activity increases after emergence, enhanced by a D2 agonist                                                     |
| Zhang <i>et al.</i> (2021) <sup>54</sup>           | Nucleus accumbens shell/dopamine                           | Isoflurane                                                        | Mouse         | D1 receptor agonist accelerates emergence in young but not aged mice                                                      |
| Bao <i>et al.</i> (2021) <sup>55</sup>             | Nucleus accumbens/dopamine                                 | Sevoflurane                                                       | Mouse         | Chemogenetic activation of D1 receptors delays induction and accelerates emergence                                        |
| <b>Recommended literature reviews on emergence</b> |                                                            |                                                                   |               |                                                                                                                           |
| Franks (2008) <sup>56</sup>                        |                                                            |                                                                   | Human/rodent  | Molecular targets of arousal                                                                                              |
| Brown <i>et al.</i> (2010) <sup>57</sup>           |                                                            |                                                                   | Human         | Relationship of anesthesia to sleep and coma                                                                              |
| Tarnal <i>et al.</i> (2016) <sup>5</sup>           |                                                            |                                                                   | Human         | Hysteresis, neural inertia, and active emergence                                                                          |
| Kelz <i>et al.</i> (2019) <sup>4</sup>             |                                                            |                                                                   | Rodent        | Neurotransmitter modulators of emergence                                                                                  |

DAT, dopamine transporter; GABA,  $\gamma$ -aminobutyric acid; HPLC, high-pressure liquid chromatography; ICV, intracerebroventricular; PVT, paraventricular thalamus; TRN, thalamic reticular nucleus; VLPO, ventrolateral preoptic nucleus.

the reader to comprehensive reviews of mesolimbic circuitry<sup>58–62</sup> and to articles discussing transcriptomic tools for studying the brain under anesthesia,<sup>63,64</sup> such as single-cell RNA sequencing and clustered regularly interspaced short palindromic repeats/Cas9 approaches<sup>65–67</sup> that are beyond the scope of this review.

## Brain Reward Circuitry

The brain reward circuitry, also known as the mesolimbic dopamine system or mesolimbic circuitry, is composed of interconnected subcortical and cortical brain regions. This circuitry is evolutionarily conserved across mammals to mediate reinforcing behaviors important for survival, like sex<sup>68,69</sup> and food consumption.<sup>70–80</sup> The same brain regions also modulate sleep/wake transitions and states of arousal essential for executing these reward-related behaviors.<sup>81–85</sup> Dysregulation of reward seeking is concomitant with dysregulated arousal.<sup>86</sup> For example, disordered sleep is an important feature of illnesses characterized by anhedonia and dysregulated reward circuit functioning like depression, addiction, schizophrenia, and Parkinson's disease.<sup>87,88</sup>

Dopamine neurons in the ventral tegmental area project to the nucleus accumbens, forming a key projection in the mesolimbic dopamine system, the circuitry that guides reward-related behaviors and promotes arousal (fig. 2).<sup>58,89–98</sup> The nucleus accumbens is a central processing hub in ventral striatum that integrates inputs from the ventral tegmental area with inputs from myriad brain regions in the reward circuitry, which has been shown to guide a variety of behavioral responses and emotional states.<sup>58,62,70,91,99–103</sup> Distinct neurochemical markers in the striatum divide its neurons into either the direct (“go”) or indirect (“no-go”) pathways.<sup>58</sup> These markers include the dopamine receptors, which are G-protein-coupled receptors classified as either D1 ( $G_s$ -coupled) receptors that signal through the direct pathway or D2 ( $G_i$ -coupled) receptors that signal through the indirect pathway. The direct pathway, named for its direct projection to the ventral tegmental area in the midbrain, expresses the neuropeptides dynorphin and substance P, while indirect pathway peptide expression includes enkephalin and adenosine A2A receptors.<sup>58</sup> This region is very heterogeneous in anatomical and functional properties and is enriched in numerous neuropeptides, and modulators include acetylcholine, among others.<sup>58,70,97,99,100,104</sup> The dorsal striatum expresses similar dopamine receptor subtypes as ventral striatum but projects to the substantia nigra, instead of the ventral tegmental area, to guide motor responses to stimuli. In reality, the canonical role of dorsal striatum as confined to pure sensorimotor processing and the role of ventral striatum as confined to emotional processing are less explicitly segregated than was once believed (see review<sup>105</sup>).

$\gamma$ -Aminobutyric acid-mediated (GABAergic) medium spiny neurons are the principal neurons in the nucleus accumbens, comprising over 95% of the neuronal population, and form local inhibitory synapses between medium

spiny neurons, as well as long-range GABA projections to other brain regions in mesolimbic reward circuitry (fig. 2). Approximately 3% of nucleus accumbens neurons are cholinergic interneurons releasing acetylcholine, while less than 2% are inhibitory interneurons releasing GABA with either somatostatin or parvalbumin.<sup>58,106</sup> As a result, the inhibitory GABA receptors are ubiquitously expressed in nucleus accumbens in addition to neuronal expression of dopamine receptors,  $\mu$ -opioid receptors, glutamate receptors, enkephalin, dynorphin, and other neuropeptide signaling substrates. The mechanism of action of propofol and volatile anesthetics, like sevoflurane and isoflurane, is known to involve direct activation of GABA type A receptors (see review<sup>107</sup>). Binding of propofol or volatile anesthetic to GABA receptors presumably may occur at both the medium spiny neuron and interneuron, thus modulating dopaminergic signaling within the nucleus accumbens microcircuit in addition to affecting long-range GABAergic projections in mesolimbic circuitry. Dopamine signaling also changes calcium currents and *N*-methyl-D-aspartate-induced currents studied in striatal slices.<sup>108–111</sup> Changes in dopamine release, dopamine D1 receptor activation, and transcriptional activation of deltaFosB in nucleus accumbens are shown to be necessary for the behavioral and abuse liability properties of propofol administration.<sup>112–115</sup> Further research is needed to define GABA, glutamate, and dopaminergic interactions during behavioral emergence.

Ventral tegmental area dopamine neuron firing patterns signal errors in reward prediction, help to guide and modify behavior, and reinforce the motivation to seek rewards.<sup>70–74,116–119</sup> Ventral tegmental area dopamine neurons respond in two different modes: single-spike tonic firing to maintain dopamine tone<sup>120–122</sup> and phasic burst firing that is thought to signal an unexpected reward or salient event.<sup>72,123–129</sup> Dopamine neuron bursting activity increases during transitions from sleep to wakefulness.<sup>81,82</sup> Increased burst firing from ventral tegmental area neurons results in dopamine release to downstream interconnected brain regions, including the nucleus accumbens, prefrontal cortex, hypothalamus, and amygdala<sup>94,98,130,131</sup> (fig. 2).

Classically attributed to orchestrating dopamine signaling, ventral tegmental area circuitry is modulated by numerous other neuropeptides, as well as local and long-range GABAergic, glutamatergic, serotonergic, and cholinergic projections.<sup>98,132,133</sup> For example, ventral tegmental area GABA neurons send long-range projections to synapses directly on nucleus accumbens cholinergic neurons, forming one specialized circuit important for reward reinforcement<sup>100</sup> and associative learning.<sup>134</sup> Ventral tegmental area GABA neurons are also engaged in sleep arousal and modulated by anesthesia.<sup>135–137</sup> The role of ventral tegmental area GABA to nucleus accumbens cholinergic neuron projections in emergence is unclear. The ventral tegmental area connects directly with the thalamus, basal forebrain, orexinergic neurons in the hypothalamus, noradrenergic neurons



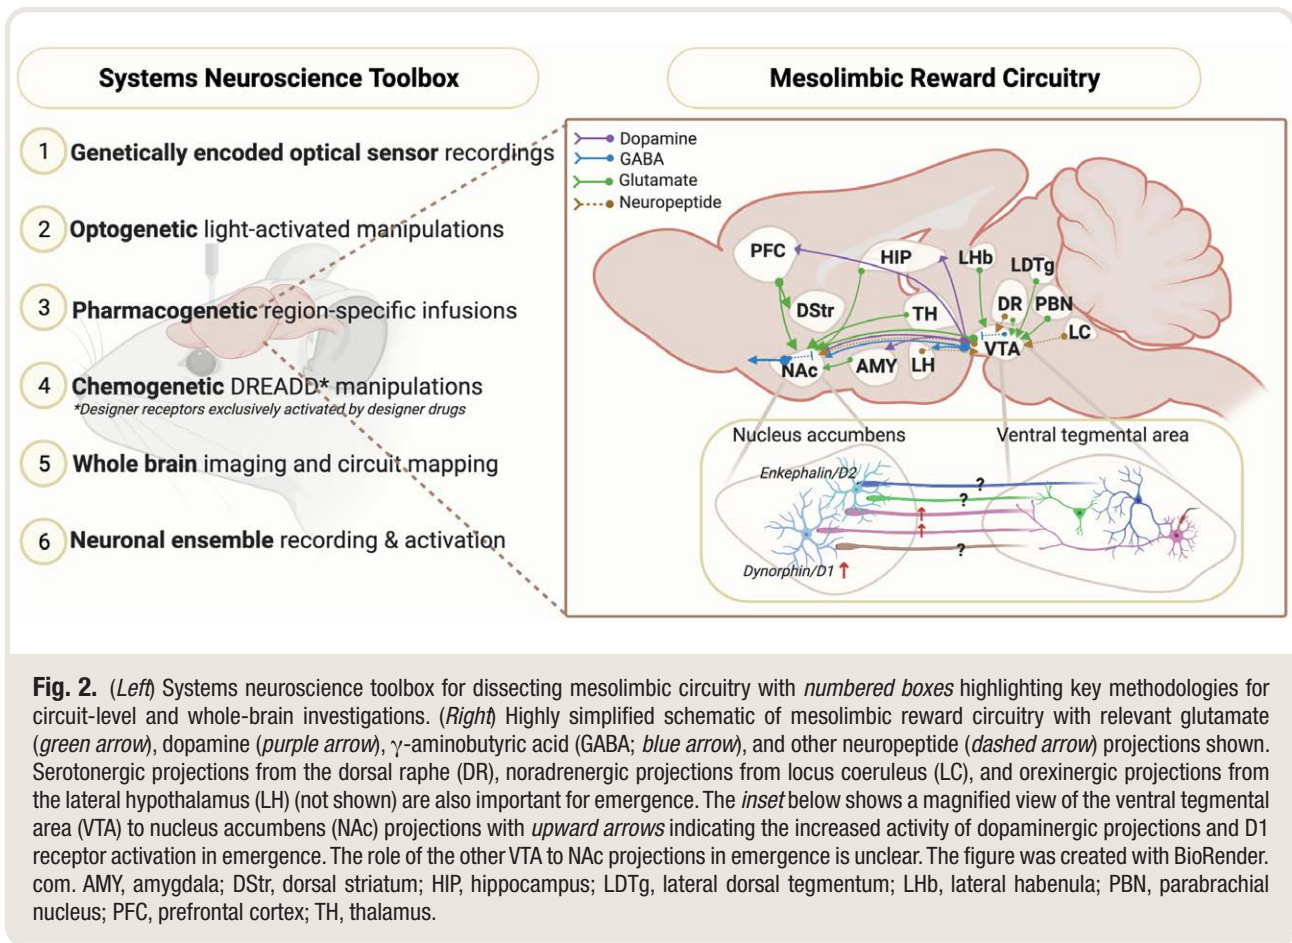

in the locus coeruleus, and serotonergic neurons in the dorsal raphe, each of which is individually important for mediating arousal and differentially affected by anesthesia.<sup>4,138,139</sup>

Importantly, the state of general anesthesia, a drug-induced reversible coma, is distinct from natural sleep (see comprehensive reviews on this topic<sup>57,140</sup>). While insight into brain reward circuitry is gained from studies of sleep arousal, the same mechanisms should not be expected to correlate directly with emergence from anesthesia. This important caveat must be considered when comparing studies of sleep arousal and anesthesia as reviewed in this article.

## Human Studies of Reward Circuitry in Emergence

Pharmacologic, neuroimaging, and genetic manipulations support the role of monoaminergic circuits in both arousal from sleep and emergence from general anesthesia. Dopamine and norepinephrine are important neurotransmitter mediators of arousal, as evidenced by impaired arousal seen in mice missing the dopamine  $\beta$ -hydroxylase<sup>26,141,142</sup> and dopamine transporter<sup>143</sup> genes. In humans, single-nucleotide gene polymorphisms affecting the dopamine transporter and dopamine D2 receptor genes are associated

with variations in self-reported sleep duration.<sup>144</sup> Treatment with a tyrosine hydroxylase inhibitor, with the end result of decreasing dopaminergic tone, increases sleepiness in studies of healthy adults.<sup>145,146</sup> Dopamine D2 receptor levels also decrease specifically in the human ventral striatum after sleep deprivation, as assayed by positron emission tomography imaging.<sup>147</sup>

In contrast, stimulants that increase dopaminergic and catecholaminergic tone have strong effects on arousal. Dopamine-enhancing medications heighten arousal and accelerate emergence, as shown by studies of D1 receptor agonist treatment.<sup>148,149</sup> In contrast, dopamine antagonism with droperidol slows emergence by deepening sevoflurane anesthesia.<sup>150</sup> Together, these studies indicate a role for dopaminergic tone in promoting arousal, with a specific role for activation of dopamine receptors in ventral striatum.

Human neuroimaging under anesthesia consistently demonstrates thalamic deactivation and disruption of thalamocortical connectivity in states of general anesthesia,<sup>151–154</sup> along with deactivation of the basal forebrain and basal ganglia,<sup>36</sup> important components of the brain reward circuitry. Studies using functional magnetic resonance imaging infer changes in brain activity by correlating changes in cerebral

blood flow. However, they are not able to directly measure neuronal activity, an important limitation when interpreting results of functional magnetic resonance imaging studies. Invasive electrocorticography can be used to obtain direct recordings from the cortex of patients undergoing neurosurgery for intractable epilepsy. These studies demonstrate thalamocortical suppression with induction of general anesthesia, while recovery from anesthesia reflects a progressive increase in cortical activity, a decrease in reticulothalamic activity, and a return of tonic activity in the thalamus.<sup>155</sup> General anesthesia also inhibits auditory processing in higher-order auditory association areas while maintaining local field potential neuronal activity in the primary auditory cortex, suggesting that anesthesia may selectively affect higher-order signaling to disrupt cortical circuits.<sup>156</sup>

Anesthesia research in both rodent models and the human clinical population utilize electroencephalogram (EEG) changes and perioperative EEG monitoring as a tool for monitoring the depth of anesthesia. General anesthetics are well known to produce distinct EEG patterns, with a shared pattern of increased delta oscillations (see a recent review<sup>140</sup>). Interestingly, a recent study links increased delta oscillations to dopamine depletion and loss of D2 receptor activation in mouse striatum independent of anesthesia exposure.<sup>159</sup> Studies of D1 dopamine receptor activation during emergence from isoflurane anesthesia in mice show reduced delta and increased gamma oscillations, accelerating emergence.<sup>54,148</sup> EEG changes do not always reliably correlate with behavioral arousal. For example, optogenetic stimulation of ventral tegmental area dopamine neurons promoted behavioral arousal with minimal change in EEG.<sup>42</sup>

EEG studies of the brain are useful as a noninvasive and easily translatable method but have limitations for interpretation. A recent multicenter study enrolled 60 healthy volunteers to evaluate frontal-parietal EEG dynamics in recovery from anesthesia, independent of surgery.<sup>160</sup> Results from this study support a model of early return of prefrontal cortical dynamics and executive function. However, EEG dynamics do not predict cognitive recovery after anesthesia. Burst suppression in the EEG is considered to reflect a very deep state of anesthesia that may be desirable to avoid.<sup>158</sup> In a study of 27 healthy human volunteers, EEG burst suppression does not change the time to emergence or affect the degree of cognitive impairment after isoflurane exposure, using a computational model to predict time of emergence.<sup>161</sup> The Electroencephalography Guidance of Anesthesia to Alleviate Geriatric Syndromes (ENGAGES) randomized clinical trial also finds that EEG-guided administration of general anesthesia does not reduce the incidence of postoperative delirium, compared to usual care, in adults aged 60 yr and older.<sup>162</sup> Thus, while EEG is a useful readout of brain oscillatory arousal states, it is only one tool for evaluating clinical effects of emergence in the perioperative setting. A multidisciplinary systems neuroscience approach, additionally informed by

preclinical research, is needed for a holistic view of anesthesia emergence and postanesthetic cognitive sequelae.

## Preclinical Studies of Reward Circuitry in Emergence

Current basic neuroscience understanding of arousal is derived primarily from rodent studies of sleep/wake states and general anesthesia.<sup>35,42,46,49,52,85,135,137,138,163</sup> Sleep studies in rodents consistently support a central role for dopaminergic signaling and specifically ventral tegmental area neuron activity in arousal.<sup>26,85,135,137</sup> Emergence from anesthesia, defined as arousal and return of awareness, is assayed behaviorally in the rodent by restoration of the righting reflex response, a reflex that develops shortly after birth to maintain the prone position. In these studies, the mouse or rat is turned on its back while anesthetized, and upon emergence, the animal will right itself to having its paws on the ground.<sup>56,164–167</sup>

Preclinical research supports an important role for dopaminergic signaling in mediating emergence from anesthesia. Isoflurane anesthesia inhibits synaptic vesicle exocytosis from dopamine neurons in cultured rat ventral tegmental area dopamine neurons.<sup>48,168</sup> Subanesthetic propofol exposure causes an increase in spontaneous ventral tegmental area dopamine neuron firing recorded from rat brain slices, and propofol potentiates evoked postsynaptic excitatory synaptic currents recorded downstream in the nucleus accumbens.<sup>169</sup> The stimulant drug amphetamine also causes presynaptic release of dopamine and inhibits dopamine reuptake in the striatum in recordings from striatal brain slices.<sup>170</sup> Systemic administration of methylphenidate and amphetamine, which increase catecholaminergic tone by inhibiting norepinephrine and dopamine reuptake, speeds emergence from both isoflurane and propofol general anesthesia in rodents, as measured behaviorally by restoration of the righting reflex.<sup>171–174</sup> Similarly, other reports show that intravenous caffeine administration also accelerates emergence from isoflurane general anesthesia in both mice and humans.<sup>175–178</sup> These indirect pharmacologic studies support a general role for increased dopaminergic tone influencing emergence.

Studies directly manipulating the ventral tegmental area under general anesthesia demonstrate the sufficiency of ventral tegmental area neuron activity in promoting emergence. Direct stimulation of ventral tegmental area neurons using an electrode inserted above the ventral tegmental area in the rat results in faster emergence from both isoflurane and propofol anesthesia.<sup>38</sup> Further, cell type-specific stimulation of only dopamine neurons in the ventral tegmental area using optogenetics in transgenic mice promotes emergence from isoflurane anesthesia.<sup>42</sup> Together, these findings support a working model of reduced ventral tegmental area dopamine neuron activity under general anesthesia, with emergence characterized by a resurgence of dopamine activity as brought about by direct neuronal stimulation or stimulant drug administration.

Multiple reports indicate a critical role for the engagement and activation of dopamine receptors during emergence. Early studies of phenobarbital anesthesia demonstrate a role for activation of both dopamine D1 and dopamine D2 receptors in promoting emergence using systemic receptor agonist treatment in rats<sup>179,180</sup> and rabbits.<sup>181</sup> Dopamine D1 receptor agonists promote emergence from isoflurane and propofol anesthesia.<sup>148</sup> Administration of A2A receptor agonist, which also activates medium spiny neurons expressing D2 receptors, modulates the depth of propofol anesthesia and activates the nucleus accumbens in mice as measured by increased cFos expression.<sup>182</sup> However, these studies all use systemic administration of dopamine receptor agonists, so the neural circuit mechanism and sites of their action in the brain are unknown. Direct microinjection of D1 receptor agonist or antagonist into the nucleus accumbens supports a bidirectional regulation of time to emergence with dopamine receptor activation specifically within the nucleus accumbens.<sup>54</sup> In addition, selective chemogenetic activation of nucleus accumbens D1 receptor-expressing neurons accelerates emergence and delays induction with sevoflurane.<sup>55</sup>

Together, these findings support a working model of the anesthetized state as marked by a reduction of dopaminergic tone, with emergence from anesthesia promoted by increased ventral tegmental area dopamine neuron activity, which subsequently causes activation of downstream D1-type dopamine receptors within the nucleus accumbens (fig. 2). It is unclear whether the increase in ventral tegmental area activity is driven by increases in tonic dopamine neuron firing or phasic discharge during emergence. While ventral tegmental area dopamine appears to be necessary for emergence, it is unclear whether ventral tegmental area stimulation alone is sufficient to drive emergence. Optogenetic studies of ventral tegmental area dopamine neurons in emergence used repeated stimulation for more than 30 min to increase the probability of righting.<sup>42</sup> Additional mechanisms may be engaged within ventral tegmental area circuitry with repeated stimulation over time. Ventral tegmental area dopamine neurons project to numerous target brain regions to form the mesolimbic reward circuit, as discussed previously. Outside of the ventral tegmental area, manipulations of the parabrachial nucleus, which directly projects to the ventral tegmental area, the locus coeruleus, and the thalamus, also promote emergence from general anesthesia.<sup>40,183–186</sup> It is possible that additional dopaminergic pathways are further engaged in these studies. In addition to dopamine, the ventral tegmental area contains numerous neuropeptide-containing neurons,<sup>70</sup> as well as GABAergic and glutamatergic cells that can send long-range projections. The effects of increased ventral tegmental area neuron activity during emergence on heterogeneous downstream circuitry remains to be fully described (fig. 2, *inset*). Many investigations of brain circuitry also largely ignore the contribution of nonneuronal cell types, while there is a new study

indicating an important role for astrocytes in emergence.<sup>187</sup> Future research must be aimed at comprehensively evaluating all cell types in target brain circuit regions during emergence to form a complete mechanistic understanding and provide new therapeutic targets.

## Preclinical Neuroscience Methods for Neural Circuit Investigation

Modern neuroscience tools enable a detailed dissection of neural circuits in the awake-behaving animal with high temporal and spatial resolution using optical manipulation and behavioral modeling. Neural circuit investigation is strengthened by an interrogation at multiple levels of analysis, from molecular/cellular to systems to behavioral. Beginning with the revolutionary introduction of optogenetics,<sup>188–190</sup> the optical tools available for interrogating brain circuit connectivity now extend from light-activated ion channels to optically active G-protein-coupled receptors, like parainopsin<sup>191</sup> and the optogenetically activated  $\mu$ -opioid receptor<sup>69,146</sup> and  $\beta_2$  adrenergic receptor.<sup>147</sup> Genetically encoded fluorescent sensors of neuropeptide and neurotransmitter release, such as the dLight sensor, which detects dopamine release, and the GPCR activation-based norepinephrine sensor, which detects norepinephrine release,<sup>195</sup> among many others,<sup>196</sup> are used together with calcium imaging to better elucidate the dynamics of neural circuit action during behavior. Optofluidic devices also enable the wireless light-evoked delivery of drugs into the brain for pharmacologic studies with high temporal and regional specificity.<sup>197–200</sup> Coupled to transcriptomic manipulations at the single-cell level, the investigation of novel receptor-mediated signaling mechanisms in specific brain circuits is possible with exquisite detail.<sup>201</sup>

Advances in microscopy now allow for imaging across the whole brain at single-cell resolution after brain clearing using light sheet microscopy.<sup>202</sup> Some studies of general anesthesia are beginning to take advantage of the whole-brain approach to investigating neural circuits, like the reticular activating system.<sup>203</sup> In addition, calcium dynamics can be imaged at the individual neuronal level within a specified circuit using *in vivo* two-photon microscopy in a head-fixed animal or *in vivo* one-photon imaging after implanting a miniature microscope (graded index lens) in freely moving mice.<sup>204–207</sup> Calcium imaging can then be paired with optogenetic studies to dissect the effects of circuit activation or inhibition on neuronal activity. These newer imaging modalities provide high single-cell and spatial resolution, enabling detailed cellular-level preclinical investigations, compared to approaches with poorer spatial resolution like functional magnetic resonance imaging and positron emission tomography.<sup>208,209</sup>

Multiregion, high-density recordings of neuronal activity using advanced physiology methods like implanted silicone probes, called Neuropixels (imec, Leuven, Belgium), can

be used to decipher circuit activity during emergence.<sup>195</sup> Neuropixels do not utilize genetically encoded sensors and thus lack cell-type specificity, as well as tracking of the same neurons across long-term temporal domains.<sup>210</sup> However, Neuropixels can be paired with optotagging, in which a neuron is optogenetically activated to determine its identity, and the high-density nature of Neuropixels recordings affords a more system-wide view of a given series of brain regions.

Neuronal recordings and optogenetic manipulation can then be paired with computational neuroethology for closed-loop stimulation or analytical studies.<sup>211</sup> Closed-loop deep brain stimulation therapy improved depression symptoms in one individual with major depression,<sup>212</sup> and similar approaches could be adopted for modifying emergence. Open source toolkits for high-throughput behavioral analysis using machine learning approaches, like DeepLabCut,<sup>213</sup> SimBA (<https://github.com/sgoldenlab/simba>, Golden Lab, University of Washington, Seattle, Washington),<sup>214</sup> or DeepSqueak,<sup>215</sup> can be applied to studying emergence from anesthesia. Machine learning approaches are useful for identifying previously unknown behavioral repertoires within simple behaviors, such as grooming<sup>216</sup> and subtle pharmacologic effects on behavior in rodents.<sup>217</sup> Behavioral models of emergence such as spontaneous restoration of the righting reflex are currently analyzed as a binary output interpreted by visual manual scoring (either positive when the rodent is aroused and upright or negative when the rodent is lying unconscious on its back). The binary restoration of the righting reflex model as currently analyzed is suggested to variably correlate with cortical signatures of arousal assayed by EEG and local field potential analysis.<sup>218</sup> Even a simple experimental model like restoration of the righting reflex presents an array of behavioral features (*e.g.*, whisker movement, tail curling, side rolling, increased chest movement, then righting). In-depth behavioral classification using pose estimation and machine learning classification methods helps to remove experimenter subjectivity and provides an automated analysis pipeline to facilitate data comparisons across experiments, investigators, and research centers. There are several studies applying machine learning approaches to assessing depth of anesthesia in human subjects.<sup>219,220</sup> These approaches may yield further mechanistic insights when also translated to the preclinical model for concurrent neural circuit interrogations.

## Conclusions: Bridging the Preclinical–Clinical Divide

To develop a better understanding of anesthetic emergence and work toward new clinical strategies to promote smooth emergence, existing studies of network state changes in humans might be used as working templates for further mechanistic dissection of brain arousal circuitry in

preclinical animal models. By layering relevant clinically translational endpoints onto preclinical models, such as EEG analysis and functional magnetic resonance imaging to identify shared areas of activation, a comprehensive view of brain circuitry during emergence may develop. The preclinical model can then be used to develop a more granular mechanistic analysis of neuronal changes, taking advantage of high-resolution single-cell approaches in the context of whole-brain dynamics.

Emergence is likely a convergence of the activity of multiple distributed transmitters, receptors, and circuits, for example, a unification of orexinergic, dopaminergic, and noradrenergic systems.<sup>4</sup> Further investigations are needed to understand the effects of different anesthetic conditions, like ketamine as compared to sevoflurane or propofol, on neural circuits. To study emergence, the aggregate brain network must then be examined using network-wide manipulations. The patterns of neuronal circuit activity that regulate emergence can be directly controlled and modified by utilizing closed-loop approaches, as discussed in this article. Additional tools to elucidate behaviorally activated brain-wide circuits include utilizing transgenic mice, like Fos-CreER<sup>T2</sup>,<sup>221</sup> together with viral approaches to access activity-regulated neuronal ensembles<sup>207,222,223</sup> (see review<sup>224</sup>). At this level of whole-brain analysis and neuronal activity, it is then possible to generate neuronal decoders for predicting and modifying emergence. Overall, an improved understanding of brain circuitry changes during emergence will help to facilitate predictable transitions from the anesthetized state to the awake state that will in turn improve patient safety and satisfaction with anesthesia care.

While it is not easy to reconcile preclinical and clinical approaches, innovative new tools exist for studying brain circuitry that can be applied strategically to heighten the translational value of preclinical anesthesia investigations. We must build dialogue and collaborative studies between basic neuroscientists and clinician researchers, appreciate the limitations of each scientific approach, and compare parallel findings from the preclinical and clinical literature as guides for future shared investigation.

## Acknowledgments

The figures were created with BioRender (BioRender.com, Toronto, Ontario, Canada) with assistance from Sam Golden, Ph.D. (Department of Biological Structure, University of Washington, Seattle, Washington).

## Research Support

Supported by a Foundation for Anesthesia Education and Research (Schaumburg, Illinois) mentored research training grant (to Dr. Heshmati) and by National Institute on Drug Abuse (Bethesda, Maryland) grant No. R37DA033396 (to Dr. Bruchas).



## Competing Interests

The authors declare no competing interests.

## Correspondence

Address correspondence to Dr. Heshmati: University of Washington, 1959 NE Pacific Street, Box 357420, Seattle, Washington 98195. mhesh@uw.edu. ANESTHESIOLOGY's articles are made freely accessible to all readers on www.anesthesiology.org, for personal use only, 6 months from the cover date of the issue.

## References

- Eckenhoff JE, Kneale DH, Dripps RD: The incidence and etiology of postanesthetic excitement: A clinical survey. *ANESTHESIOLOGY* 1961; 22:667–73
- Hughes CG, Boncyk CS, Culley DJ, Fleisher LA, Leung JM, McDonagh DL, Gan TJ, McEvoy MD, Miller TE; Perioperative Quality Initiative (POQI) 6 Workgroup: American Society for Enhanced Recovery and Perioperative Quality Initiative joint consensus statement on postoperative delirium prevention. *Anesth Analg* 2020; 130:1572–90
- Menser C, Smith H: Emergence agitation and delirium: Considerations for epidemiology and routine monitoring in pediatric patients. *Local Reg Anesth* 2020; 13:73–83
- Kelz MB, García PS, Mashour GA, Solt K: Escape from oblivion: Neural mechanisms of emergence from general anesthesia. *Anesth Analg* 2019; 128:726–36
- Tarnal V, Vlisides PE, Mashour GA: The neurobiology of anesthetic emergence. *J Neurosurg Anesthesiol* 2016; 28:250–5
- Cascella M, Bimonte S, Muzio MR: Towards a better understanding of anesthesia emergence mechanisms: Research and clinical implications. *World J Methodol* 2018; 8:9–16
- Proekt A, Kelz MB: Explaining anaesthetic hysteresis with effect-site equilibration. *Br J Anaesth* 2021; 126:265–78
- McKinstry-Wu AR, Proekt A, Kelz MB: Neural inertia: A sticky situation for anesthesia. *J Neurosurg Anesthesiol* 2020; 32:190–2
- Kuizenga MH, Colin PJ, Reyntjens KMEM, Touw DJ, Nalbat H, Knotnerus FH, Vereecke HEM, Struys MMRF: Test of neural inertia in humans during general anaesthesia. *Br J Anaesth* 2018; 120:525–36
- Inouye SK, Robinson T, Blaum C, Busby-Whitehead J, Boustani M, Chalian A, Deiner S, Fick D, Hutchison L, Johanning J, Katlic M, Kempton J, Kennedy M, Kimchi E, Ko C, Leung J, Mattison M, Mohanty S, Nana A, Needham D, Neufeld K, Richter H: Postoperative delirium in older adults: Best practice statement from the American Geriatrics Society. *J Am Coll Surg* 2015; 220:136–48.e1
- Vlisides P, Avidan M: Recent advances in preventing and managing postoperative delirium. *F1000Res* 2019; 8:F1000 Faculty Rev–607
- Deiner S, Liu X, Lin HM, Sieber F, Boockvar K, Sano M, Baxter MG: Subjective cognitive complaints in patients undergoing major non-cardiac surgery: A prospective single centre cohort trial. *Br J Anaesth* 2019; 122:742–50
- Costi D, Cyna AM, Ahmed S, Stephens K, Strickland P, Ellwood J, Larsson JN, Chooi C, Burgoyne LL, Middleton P: Effects of sevoflurane *versus* other general anaesthesia on emergence agitation in children. *Cochrane Database Syst Rev* 2014; 12:CD007084
- Miller D, Lewis SR, Pritchard MW, Schofield-Robinson OJ, Shelton CL, Alderson P, Smith AF: Intravenous *versus* inhalational maintenance of anaesthesia for postoperative cognitive outcomes in elderly people undergoing non-cardiac surgery. *Cochrane Database Syst Rev* 2018; 8:CD012317
- Cao JL, Pei YP, Wei JQ, Zhang YY: Effects of intraoperative dexmedetomidine with intravenous anesthesia on postoperative emergence agitation/delirium in pediatric patients undergoing tonsillectomy with or without adenoidectomy: A CONSORT-prospective, randomized, controlled clinical trial. *Medicine (Baltimore)* 2016; 95:e5566
- Rao Y, Zeng R, Jiang X, Li J, Wang X: The effect of dexmedetomidine on emergence agitation or delirium in children after anesthesia: A systematic review and meta-analysis of clinical studies. *Front Pediatr* 2020; 8:329
- Hauber JA, Davis PJ, Bendel LP, Martyn SV, McCarthy DL, Evans MC, Cladis FP, Cunningham S, Lang RS, Campbell NF, Tuchman JB, Young MC: Dexmedetomidine as a rapid bolus for treatment and prophylactic prevention of emergence agitation in anesthetized children. *Anesth Analg* 2015; 121:1308–15
- Zhang YZ, Wang X, Wu JM, Song CY, Cui XG: Optimal dexmedetomidine dose to prevent emergence agitation under sevoflurane and remifentanyl anesthesia during pediatric tonsillectomy and adenoidectomy. *Front Pharmacol* 2019; 10:1091
- Prabhakar H, Singh GP, Mahajan C, Kapoor I, Kalaivani M, Anand V: Intravenous *versus* inhalational techniques for rapid emergence from anaesthesia in patients undergoing brain tumour surgery. *Cochrane Database Syst Rev* 2016; 9:CD010467
- Ortiz AC, Atallah AN, Matos D, da Silva EMK: Intravenous *versus* inhalational anaesthesia for paediatric outpatient surgery. *Cochrane Database Syst Rev* 2014; 7:CD009015
- Muindi F, Kenny JD, Taylor NE, Solt K, Wilson MA, Brown EN, Van Dort CJ: Electrical stimulation of the parabrachial nucleus induces reanimation from isoflurane general anesthesia. *Behav Brain Res* 2016; 306:20–5

22. Melonakos ED, Siegmann MJ, Rey C, O'Brien C, Nikolaeva KK, Solt K, Nehs CJ: Excitation of putative glutamatergic neurons in the rat parabrachial nucleus region reduces delta power during dexmedetomidine but not ketamine anesthesia. *ANESTHESIOLOGY* 2021; 135:633–48
23. Jiang-Xie LF, Yin L, Zhao S, Prevosto V, Han BX, Dzirasa K, Wang F: A common neuroendocrine substrate for diverse general anesthetics and sleep. *Neuron* 2019; 102:1053–1065.e4
24. Radwan B, Liu H, Chaudhury D: The role of dopamine in mood disorders and the associated changes in circadian rhythms and sleep–wake cycle. *Brain Res* 2019; 1713:42–51
25. Oishi Y, Lazarus M: The control of sleep and wakefulness by mesolimbic dopamine systems. *Neurosci Res* 2017; 118:66–73
26. Palmiter RD: Dopamine signaling as a neural correlate of consciousness. *Neuroscience* 2011; 198:213–20
27. O'Shea DJ, Kalanithi P, Ferenczi EA, Hsueh B, Chandrasekaran C, Goo W, Diester I, Ramakrishnan C, Kaufman MT, Ryu SI, Yeom KW, Deisseroth K, Shenoy KV: Development of an optogenetic toolkit for neural circuit dissection in squirrel monkeys. *Sci Rep* 2018; 8:6775
28. Oyama K, Hori Y, Nagai Y, Miyakawa N, Mimura K, Hirabayashi T, Inoue KI, Suhara T, Takada M, Higuchi M, Minamimoto T: Chemogenetic dissection of the primate prefronto-subcortical pathways for working memory and decision-making. *Sci Adv* 2021; 7:eabg4246
29. El-Shamayleh Y, Horwitz GD: Primate optogenetics: Progress and prognosis. *Proc Natl Acad Sci U S A* 2019; 116:26195–203
30. Tremblay S, Acker L, Afraz A, Albaugh DL, Amita H, Andrei AR, Angelucci A, Aschner A, Balan PF, Basso MA, Benvenuti G, Bohlen MO, Caiola MJ, Calcedo R, Cavanaugh J, Chen Y, Chen S, Chernov MM, Clark AM, Dai J, Debes SR, Deisseroth K, Desimone R, Dragoi V, Egger SW, Eldridge MAG, El-Nahal HG, Fabbri F, Federer F, Fetsch CR, Fortuna MG, Friedman RM, Fujii N, Gail A, Galvan A, Ghosh S, Giesermann MA, Gulli RA, Hikosaka O, Hosseini EA, Hu X, Hüer J, Inoue KI, Janz R, Jazayeri M, Jiang R, Ju N, Kar K, Klein C, Kohn A, Komatsu M, Maeda K, Martinez-Trujillo JC, Matsumoto M, Maunsell JHR, Mendoza-Halliday D, Monosov IE, Muers RS, Nurminen L, Ortiz-Rios M, O'Shea DJ, Palfi S, Petkov CI, Pojoga S, Rajalingham R, Ramakrishnan C, Remington ED, Revsine C, Roe AW, Sabes PN, Saunders RC, Scherberger H, Schmid MC, Schultz W, Seidemann E, Senova YS, Shadlen MN, Sheinberg DL, Siu C, Smith Y, Solomon SS, Sommer MA, Spudich JL, Stauffer WR, Takada M, Tang S, Thiele A, Treue S, Vanduffel W, Vogels R, Whitmore MP, Wichmann T, Wurtz RH, Xu H, Yazdan-Shahmorad A, Shenoy KV, DiCarlo JJ, Platt ML: An open resource for non-human primate optogenetics. *Neuron* 2020; 108:1075–90.e6
31. Mantz J, Varlet C, Lecharny JB, Henzel D, Lenot P, Desmonts JM: Effects of volatile anesthetics, thiopental, and ketamine on spontaneous and depolarization-evoked dopamine release from striatal synaptosomes in the rat. *ANESTHESIOLOGY* 1994; 80:352–63
32. Irifune M, Sato T, Nishikawa T, Masuyama T, Nomoto M, Fukuda T, Kawahara M: Hyperlocomotion during recovery from isoflurane anesthesia is associated with increased dopamine turnover in the nucleus accumbens and striatum in mice. *ANESTHESIOLOGY* 1997; 86:464–75
33. Tsukada H, Nishiyama S, Kakiuchi T, Ohba H, Sato K, Harada N, Nakanishi S: Isoflurane anesthesia enhances the inhibitory effects of cocaine and GBR12909 on dopamine transporter: PET studies in combination with microdialysis in the monkey brain. *Brain Res* 1999; 849:85–96
34. Fiset P, Paus T, Daloze T, Plourde G, Meuret P, Bonhomme V, Hajj-Ali N, Backman SB, Evans AC: Brain mechanisms of propofol-induced loss of consciousness in humans: A positron emission tomographic study. *J Neurosci* 1999; 19:5506–13
35. Kelz MB, Sun Y, Chen J, Cheng Meng Q, Moore JT, Veasey SC, Dixon S, Thornton M, Funato H, Yanagisawa M: An essential role for orexins in emergence from general anesthesia. *Proc Natl Acad Sci U S A* 2008; 105:1309–14
36. Mhuircheartaigh RN, Rosenorn-Lanng D, Wise R, Jbabdi S, Rogers R, Tracey I: Cortical and subcortical connectivity changes during decreasing levels of consciousness in humans: A functional magnetic resonance imaging study using propofol. *J Neurosci* 2010; 30:9095–102
37. Shirasaka T, Yonaha T, Onizuka S, Tsuneyoshi I: Effects of orexin-A on propofol anesthesia in rats. *J Anesth* 2011; 25:65–71
38. Solt K, Van Dort CJ, Chemali JJ, Taylor NE, Kenny JD, Brown EN: Electrical stimulation of the ventral tegmental area induces reanimation from general anesthesia. *ANESTHESIOLOGY* 2014; 121:311–9
39. McCarren HS, Chalifoux MR, Han B, Moore JT, Meng QC, Baron-Hionis N, Sedigh-Sarvestani M, Contreras D, Beck SG, Kelz MB:  $\alpha 2$ -Adrenergic stimulation of the ventrolateral preoptic nucleus destabilizes the anesthetic state. *J Neurosci* 2014; 34:16385–96
40. Vazey EM, Aston-Jones G: Designer receptor manipulations reveal a role of the locus coeruleus noradrenergic system in isoflurane general anesthesia. *Proc Natl Acad Sci U S A* 2014; 111:3859–64
41. Zhou X, Wang Y, Zhang C, Wang M, Zhang M, Yu L, Yan M: The role of dopaminergic VTA neurons in general anesthesia. *PLoS One* 2015; 10:e0138187

42. Taylor NE, Van Dort CJ, Kenny JD, Pei J, Guidera JA, Vlasov KY, Lee JT, Boyden ES, Brown EN, Solt K: Optogenetic activation of dopamine neurons in the ventral tegmental area induces reanimation from general anesthesia. *Proc Natl Acad Sci U S A* 2016; 113:12826–31
43. Fu B, Yu T, Yuan J, Gong X, Zhang M: Noradrenergic transmission in the central medial thalamic nucleus modulates the electroencephalographic activity and emergence from propofol anesthesia in rats. *J Neurochem* 2017; 140:862–73
44. Du W, Zhang R, Li J, Zhang B, Peng X, Cao S, Yuan J, Yuan C, Yu T, Du J: The locus coeruleus modulates intravenous general anesthesia of zebrafish via a cooperative mechanism. *Cell Rep* 2018; 24:3146–3155.e3
45. Yin L, Li L, Deng J, Wang D, Guo Y, Zhang X, Li H, Zhao S, Zhong H, Dong H: Optogenetic/chemogenetic activation of GABAergic neurons in the ventral tegmental area facilitates general anesthesia via projections to the lateral hypothalamus in mice. *Front Neural Circuits* 2019; 13:73
46. Wang TX, Xiong B, Xu W, Wei HH, Qu WM, Hong ZY, Huang ZL: Activation of parabrachial nucleus glutamatergic neurons accelerates reanimation from sevoflurane anesthesia in mice. *ANESTHESIOLOGY* 2019; 130:106–18
47. Zhang Y, Fu B, Liu C, Yu S, Luo T, Zhang L, Zhou W, Yu T: Activation of noradrenergic terminals in the reticular thalamus delays arousal from propofol anesthesia in mice. *FASEB J* 2019; 33:7252–60
48. Torturo CL, Zhou ZY, Ryan TA, Hemmings HC: Isoflurane inhibits dopaminergic synaptic vesicle exocytosis coupled to CaV2.1 and CaV2.2 in rat midbrain neurons. *eNeuro* 2019; 6:ENEURO.0278-18.2018
49. Li J, Li H, Wang D, Guo Y, Zhang X, Ran M, Yang C, Yang Q, Dong H: Orexin activated emergence from isoflurane anaesthesia involves excitation of ventral tegmental area dopaminergic neurones in rats. *Br J Anaesth* 2019; 123:497–505
50. Zhang X, Baer AG, Price JM, Jones PC, Garcia BJ, Romero J, Cliff AM, Mi W, Brown JB, Jacobson DA, Lydic R, Baghdoyan HA: Neurotransmitter networks in mouse prefrontal cortex are reconfigured by isoflurane anesthesia. *J Neurophysiol* 2020; 123:2285–96
51. Luo T-Y, Cai S, Qin Z-X, Yang S-C, Shu Y, Liu C-X, Zhang Y, Zhang L, Zhou L, Yu T, Yu S-Y: Basal forebrain cholinergic activity modulates isoflurane and propofol anesthesia. *Front Neurosci* 2020; 14:559077
52. Gredenford S, Olthof BMJ, Stylianou M, Rees A, Gartside SE, LeBeau FEN: Electrical stimulation of the ventral tegmental area evokes sleep-like state transitions under urethane anaesthesia in the rat medial prefrontal cortex via dopamine D1-like receptors. *Eur J Neurosci* 2020; 52:2915–30
53. Ao Y, Yang B, Zhang C, Li S, Xu H: Application of quinpirole in the paraventricular thalamus facilitates emergence from isoflurane anesthesia in mice. *Brain Behav* 2021; 11:e01903
54. Zhang Y, Gui H, Hu L, Li C, Zhang J, Liang X: Dopamine D1 receptor in the NAc shell is involved in delayed emergence from isoflurane anesthesia in aged mice. *Brain Behav* 2021; 11:e01913
55. Bao WW, Xu W, Pan GJ, Wang TX, Han Y, Qu WM, Li WX, Huang ZL: Nucleus accumbens neurons expressing dopamine D1 receptors modulate states of consciousness in sevoflurane anesthesia. *Curr Biol* 2021; 31:1893–902.e5
56. Franks NP: General anaesthesia: From molecular targets to neuronal pathways of sleep and arousal. *Nat Rev Neurosci* 2008; 9:370–86
57. Brown EN, Lydic R, Schiff ND: General anesthesia, sleep, and coma. *N Engl J Med* 2010; 363:2638–50
58. Castro DC, Bruchas MR: A motivational and neuro-peptidergic hub: Anatomical and functional diversity within the nucleus accumbens shell. *Neuron* 2019; 102:529–52
59. Kreitzer AC, Malenka RC: Striatal plasticity and basal ganglia circuit function. *Neuron* 2008; 60:543–54
60. Castro DC, Cole SL, Berridge KC: Lateral hypothalamus, nucleus accumbens, and ventral pallidum roles in eating and hunger: Interactions between homeostatic and reward circuitry. *Front Syst Neurosci* 2015; 9:90
61. Serafini RA, Pryce KD, Zachariou V: The mesolimbic dopamine system in chronic pain and associated affective comorbidities. *Biol Psychiatry* 2020; 87:64–73
62. Russo SJ, Nestler EJ: The brain reward circuitry in mood disorders. *Nat Rev Neurosci* 2013; 14:609–25
63. Obal D, Wu S, McKinstry-Wu A, Tawfik VL: A guide to understanding “state-of-the-art” basic research techniques in anesthesiology. *Anesth Analg* 2020; 131:450–63
64. Luo L, Callaway EM, Svoboda K: Genetic dissection of neural circuits: A decade of progress. *Neuron* 2018; 98:256–81
65. Hunker AC, Soden ME, Krayushkina D, Heymann G, Awatramani R, Zweifel LS: Conditional single vector CRISPR/SaCas9 viruses for efficient mutagenesis in the adult mouse nervous system. *Cell Rep* 2020; 30:4303–16.e6
66. Hunker AC, Zweifel LS: Protocol to design, clone, and validate sgRNAs for *in vivo* reverse genetic studies. *STAR Protoc* 2020; 1:100070
67. Yamaguchi H, Hopf FW, Li SB, de Lecea L: *In vivo* cell type-specific CRISPR knockdown of dopamine beta hydroxylase reduces locus coeruleus evoked wakefulness. *Nat Commun* 2018; 9:5211
68. Oei NY, Rombouts SA, Soeter RP, van Gerven JM, Both S: Dopamine modulates reward system activity during subconscious processing of sexual stimuli. *Neuropsychopharmacology* 2012; 37:1729–37

69. Blum K, Werner T, Carnes S, Carnes P, Bowirrat A, Giordano J, Oscar-Berman M, Gold M: Sex, drugs, and rock 'n' roll: Hypothesizing common mesolimbic activation as a function of reward gene polymorphisms. *J Psychoactive Drugs* 2012; 44:38–55
70. Parker KE, Pedersen CE, Gomez AM, Spangler SM, Walicki MC, Feng SY, Stewart SL, Otis JM, Al-Hasani R, McCall JG, Sakers K, Bhatti DL, Copits BA, Gereau RW, Jhou T, Kash TJ, Dougherty JD, Stuber GD, Bruchas MR: A Paranigral VTA nociceptin circuit that constrains motivation for reward. *Cell* 2019; 178:653–71.e19
71. Lammel S, Lim BK, Ran C, Huang KW, Betley MJ, Tye KM, Deisseroth K, Malenka RC: Input-specific control of reward and aversion in the ventral tegmental area. *Nature* 2012; 491:212–7
72. Schultz W, Dayan P, Montague PR: A neural substrate of prediction and reward. *Science* 1997; 275:1593–9
73. Adamantidis AR, Tsai HC, Boutrel B, Zhang F, Stuber GD, Budygin EA, Touriño C, Bonci A, Deisseroth K, de Lecea L: Optogenetic interrogation of dopaminergic modulation of the multiple phases of reward-seeking behavior. *J Neurosci* 2011; 31:10829–35
74. Stuber GD, Klanker M, de Ridder B, Bowers MS, Joosten RN, Feenstra MG, Bonci A: Reward-predictive cues enhance excitatory synaptic strength onto mid-brain dopamine neurons. *Science* 2008; 321:1690–2
75. Dietrich MO, Bober J, Ferreira JG, Tellez LA, Mineur YS, Souza DO, Gao XB, Picciotto MR, Araújo I, Liu ZW, Horvath TL: AgRP neurons regulate development of dopamine neuronal plasticity and nonfood-associated behaviors. *Nat Neurosci* 2012; 15:1108–10
76. Ballard IC, Murty VP, Carter RM, MacInnes JJ, Huettel SA, Adcock RA: Dorsolateral prefrontal cortex drives mesolimbic dopaminergic regions to initiate motivated behavior. *J Neurosci* 2011; 31:10340–6
77. Bond CW, Trinko R, Foscue E, Furman K, Groman SM, Taylor JR, DiLeone RJ: Medial nucleus accumbens projections to the ventral tegmental area control food consumption. *J Neurosci* 2020; 40:4727–38
78. Wallace DL, Vialou V, Rios L, Carle-Florence TL, Chakravarty S, Kumar A, Graham DL, Green TA, Kirk A, Iñiguez SD, Perrotti LI, Barrot M, DiLeone RJ, Nestler EJ, Bolaños-Guzmán CA: The influence of DeltaFosB in the nucleus accumbens on natural reward-related behavior. *J Neurosci* 2008; 28:10272–7
79. Nieh EH, Matthews GA, Allsop SA, Presbrey KN, Leppla CA, Wichmann R, Neve R, Wildes CP, Tye KM: Decoding neural circuits that control compulsive sucrose seeking. *Cell* 2015; 160:528–41
80. Berridge KC: “Liking” and “wanting” food rewards: Brain substrates and roles in eating disorders. *Physiol Behav* 2009; 97:537–50
81. Monti JM, Monti D: The involvement of dopamine in the modulation of sleep and waking. *Sleep Med Rev* 2007; 11:113–33
82. Miller JD, Farber J, Gatz P, Roffwarg H, German DC: Activity of mesencephalic dopamine and non-dopamine neurons across stages of sleep and waking in the rat. *Brain Res* 1983; 273:133–41
83. Dong H, Wang J, Yang YF, Shen Y, Qu WM, Huang ZL: Dorsal striatum dopamine levels fluctuate across the sleep–wake cycle and respond to salient stimuli in mice. *Front Neurosci* 2019; 13:242
84. Alonso IP, Pino JA, Kortagere S, Torres GE, España RA: Dopamine transporter function fluctuates across sleep/wake state: Potential impact for addiction. *Neuropsychopharmacology* 2021; 46:699–708
85. Eban-Rothschild A, Rothschild G, Giardino WJ, Jones JR, de Lecea L: VTA dopaminergic neurons regulate ethologically relevant sleep–wake behaviors. *Nat Neurosci* 2016; 19:1356–66
86. Gutierrez R, Lobo MK, Zhang F, de Lecea L: Neural integration of reward, arousal, and feeding: Recruitment of VTA, lateral hypothalamus, and ventral striatal neurons. *IUBMB Life* 2011; 63:824–30
87. Logan RW, McClung CA: Rhythms of life: Circadian disruption and brain disorders across the lifespan. *Nat Rev Neurosci* 2019; 20:49–65
88. Dzirasa K, Ribeiro S, Costa R, Santos LM, Lin SC, Grosmark A, Sotnikova TD, Gainetdinov RR, Caron MG, Nicolelis MA: Dopaminergic control of sleep–wake states. *J Neurosci* 2006; 26:10577–89
89. Heshmati M, Russo SJ: Anhedonia and the brain reward circuitry in depression. *Curr Behav Neurosci Rep* 2015; 2:146–53
90. Morales M, Margolis EB: Ventral tegmental area: Cellular heterogeneity, connectivity and behaviour. *Nat Rev Neurosci* 2017; 18:73–85
91. Fox ME, Lobo MK: The molecular and cellular mechanisms of depression: A focus on reward circuitry. *Mol Psychiatry* 2019; 24:1798–815
92. Volkow ND, Morales M: The brain on drugs: From reward to addiction. *Cell* 2015; 162:712–25
93. Chaudhury D, Walsh JJ, Friedman AK, Juarez B, Ku SM, Koo JW, Ferguson D, Tsai HC, Pomeranz L, Christoffel DJ, Nectow AR, Ekstrand M, Domingos A, Mazei-Robison MS, Mouzon E, Lobo MK, Neve RL, Friedman JM, Russo SJ, Deisseroth K, Nestler EJ, Han MH: Rapid regulation of depression-related behaviours by control of midbrain dopamine neurons. *Nature* 2013; 493:532–6
94. Walsh JJ, Han MH: The heterogeneity of ventral tegmental area neurons: Projection functions in a mood-related context. *Neuroscience* 2014; 282:101–8
95. Tye KM, Mirzabekov JJ, Warden MR, Ferenczi EA, Tsai HC, Finkelstein J, Kim SY, Adhikari A, Thompson KR, Andalman AS, Gunaydin LA, Witten IB, Deisseroth



- K: Dopamine neurons modulate neural encoding and expression of depression-related behaviour. *Nature* 2013; 493:537–41
96. Manz KM, Becker JC, Grueter CA, Grueter BA: Histamine H3 receptor function biases excitatory gain in the nucleus accumbens. *Biol Psychiatry* 2021; 89:588–99
  97. Lim BK, Huang KW, Grueter BA, Rothwell PE, Malenka RC: Anhedonia requires MC4R-mediated synaptic adaptations in nucleus accumbens. *Nature* 2012; 487:183–9
  98. Watabe-Uchida M, Zhu L, Ogawa SK, Vamanrao A, Uchida N: Whole-brain mapping of direct inputs to midbrain dopamine neurons. *Neuron* 2012; 74:858–73
  99. Castro DC, Oswell CS, Zhang ET, Pedersen CE, Piantadosi SC, Rossi MA, Hunker A, Guglin A, Morón JA, Zweifel LS, Stuber GD, Bruchas MR: An endogenous opioid circuit determines state-dependent appetitive behavior. *Nature* 2021; 598:646–51
  100. Al-Hasani R, Gowrishankar R, Schmitz GP, Pedersen CE, Marcus DJ, Shirley SE, Hobbs TE, Elerding AJ, Renaud SJ, Jing M, Li Y, Alvarez VA, Lemos JC, Bruchas MR: Ventral tegmental area GABAergic inhibition of cholinergic interneurons in the ventral nucleus accumbens shell promotes reward reinforcement. *Nat Neurosci* 2021; 24:1414–28
  101. Heshmati M, Aleyasin H, Menard C, Christoffel DJ, Flanagan ME, Pfau ML, Hodes GE, Lepack AE, Bicks LK, Takahashi A, Chandra R, Turecki G, Lobo MK, Maze I, Golden SA, Russo SJ: Cell-type-specific role for nucleus accumbens neuroligin-2 in depression and stress susceptibility. *Proc Natl Acad Sci U S A* 2018; 115:1111–6
  102. Christoffel DJ, Walsh JJ, Heifets BD, Hoerbelt P, Neuner S, Sun G, Ravikumar VK, Wu H, Halpern CH, Malenka RC: Input-specific modulation of murine nucleus accumbens differentially regulates hedonic feeding. *Nat Commun* 2021; 12:2135
  103. Heifets BD, Salgado JS, Taylor MD, Hoerbelt P, Cardozo Pinto DF, Steinberg EE, Walsh JJ, Sze JY, Malenka RC: Distinct neural mechanisms for the prosocial and rewarding properties of MDMA. *Sci Transl Med* 2019; 11:eaaw6435
  104. Al-Hasani R, Bruchas MR: Molecular mechanisms of opioid receptor-dependent signaling and behavior. *ANESTHESIOLOGY* 2011; 115:1363–81
  105. Balleine BW, Delgado MR, Hikosaka O: The role of the dorsal striatum in reward and decision-making. *J Neurosci* 2007; 27:8161–5
  106. Kawaguchi Y, Wilson CJ, Augood SJ, Emson PC: Striatal interneurons: Chemical, physiological and morphological characterization. *Trends Neurosci* 1995; 18:527–35
  107. Hemmings HC Jr, Riegelhaupt PM, Kelz MB, Solt K, Eckenhoff RG, Orser BA, Goldstein PA: Towards a comprehensive understanding of anesthetic mechanisms of action: A decade of discovery. *Trends Pharmacol Sci* 2019; 40:464–81
  108. Surmeier DJ, Bargas J, Hemmings HC Jr, Nairn AC, Greengard P: Modulation of calcium currents by a D1 dopaminergic protein kinase/phosphatase cascade in rat neostriatal neurons. *Neuron* 1995; 14:385–97
  109. Nicola SM, Surmeier J, Malenka RC: Dopaminergic modulation of neuronal excitability in the striatum and nucleus accumbens. *Annu Rev Neurosci* 2000; 23:185–215
  110. Cepeda C, Colwell CS, Itri JN, Chandler SH, Levine MS: Dopaminergic modulation of NMDA-induced whole cell currents in neostriatal neurons in slices: Contribution of calcium conductances. *J Neurophysiol* 1998; 79:82–94
  111. Flores-Hernández J, Cepeda C, Hernández-Echeagaray E, Calvert CR, Jokel ES, Fienberg AA, Greengard P, Levine MS: Dopamine enhancement of NMDA currents in dissociated medium-sized striatal neurons: Role of D1 receptors and DARPP-32. *J Neurophysiol* 2002; 88:3010–20
  112. Xiong M, Li J, Ye JH, Zhang C: Upregulation of DeltaFosB by propofol in rat nucleus accumbens. *Anesth Analg* 2011; 113:259–64
  113. Lian Q, Wang B, Zhou W, Jin S, Xu L, Huang Q, Lai M, Lu K, Tang L, Zhu H, Lin H, Zhang F, Cao H, Li J, Chen JF, Ge RS: Self-administration of propofol is mediated by dopamine D1 receptors in nucleus accumbens in rats. *Neuroscience* 2013; 231:373–83
  114. Schulte D, Callado LF, Davidson C, Phillips PE, Roewer N, Schulte am Esch J, Stamford JA: Propofol decreases stimulated dopamine release in the rat nucleus accumbens by a mechanism independent of dopamine D2, GABA<sub>A</sub> and NMDA receptors. *Br J Anaesth* 2000; 84:250–3
  115. Pain L, Gobaille S, Schleef C, Aunis D, Oberling P: *In vivo* dopamine measurements in the nucleus accumbens after nonanesthetic and anesthetic doses of propofol in rats. *Anesth Analg* 2002; 95:915–9
  116. Takahashi YK, Batchelor HM, Liu B, Khanna A, Morales M, Schoenbaum G: Dopamine neurons respond to errors in the prediction of sensory features of expected rewards. *Neuron* 2017; 95:1395–405.e3
  117. Steinberg EE, Keiflin R, Boivin JR, Witten IB, Deisseroth K, Janak PH: A causal link between prediction errors, dopamine neurons and learning. *Nat Neurosci* 2013; 16:966–73
  118. Ferguson LM, Ahrens AM, Longyear LG, Aldridge JW: Neurons of the ventral tegmental area encode individual differences in motivational “wanting” for reward cues. *J Neurosci* 2020; 40:8951–63
  119. Hamid AA, Pettibone JR, Mabrouk OS, Hetrick VL, Schmidt R, Vander Weele CM, Kennedy RT, Aragona BJ, Berke JD: Mesolimbic dopamine signals the value of work. *Nat Neurosci* 2016; 19:117–26

120. Wang Y, Toyoshima O, Kunimatsu J, Yamada H, Matsumoto M: Tonic firing mode of midbrain dopamine neurons continuously tracks reward values changing moment-by-moment. *Elife* 2021; 10:e63166
121. Ellwood IT, Patel T, Wadia V, Lee AT, Liptak AT, Bender KJ, Sohal VS: Tonic or phasic stimulation of dopaminergic projections to prefrontal cortex causes mice to maintain or deviate from previously learned behavioral strategies. *J Neurosci* 2017; 37:8315–29
122. Mohebi A, Pettibone JR, Hamid AA, Wong JT, Vinson LT, Patriarchi T, Tian L, Kennedy RT, Berke JD: Dissociable dopamine dynamics for learning and motivation. *Nature* 2019; 570:65–70
123. Schultz W: Predictive reward signal of dopamine neurons. *J Neurophysiol* 1998; 80:1–27
124. Schultz W: The phasic reward signal of primate dopamine neurons. *Adv Pharmacol* 1998; 42:686–90
125. Grace AA, Bunney BS: Intracellular and extracellular electrophysiology of nigral dopaminergic neurons: 1. Identification and characterization. *Neuroscience* 1983; 10:301–15
126. Cai LX, Pizano K, Gundersen GW, Hayes CL, Fleming WT, Holt S, Cox JM, Witten IB: Distinct signals in medial and lateral VTA dopamine neurons modulate fear extinction at different times. *Elife* 2020; 9:e54936
127. Menegas W, Babayan BM, Uchida N, Watabe-Uchida M: Opposite initialization to novel cues in dopamine signaling in ventral and posterior striatum in mice. *Elife* 2017; 6:e21886
128. Zweifel LS, Parker JG, Lobb CJ, Rainwater A, Wall VZ, Fadok JP, Darvas M, Kim MJ, Mizumori SJ, Paladini CA, Phillips PE, Palmiter RD: Disruption of NMDAR-dependent burst firing by dopamine neurons provides selective assessment of phasic dopamine-dependent behavior. *Proc Natl Acad Sci U S A* 2009; 106:7281–8
129. Wall VZ, Parker JG, Fadok JP, Darvas M, Zweifel L, Palmiter RD: A behavioral genetics approach to understanding D1 receptor involvement in phasic dopamine signaling. *Mol Cell Neurosci* 2011; 46:21–31
130. Steinberg EE, Gore F, Heifets BD, Taylor MD, Norville ZC, Beier KT, Földy C, Lerner TN, Luo L, Deisseroth K, Malenka RC: Amygdala–midbrain connections modulate appetitive and aversive learning. *Neuron* 2020; 106:1026–43.e9
131. Juarez B, Han MH: Diversity of dopaminergic neural circuits in response to drug exposure. *Neuropsychopharmacology* 2016; 41:2424–46
132. Nair-Roberts RG, Chatelain-Badie SD, Benson E, White-Cooper H, Bolam JP, Ungless MA: Stereological estimates of dopaminergic, GABAergic and glutamatergic neurons in the ventral tegmental area, substantia nigra and retrorubral field in the rat. *Neuroscience* 2008; 152:1024–31
133. Muschamp JW, Hollander JA, Thompson JL, Voren G, Hassinger LC, Onvani S, Kamenecka TM, Borgland SL, Kenny PJ, Carlezon WA Jr: Hypocretin (orexin) facilitates reward by attenuating the antireward effects of its cotransmitter dynorphin in ventral tegmental area. *Proc Natl Acad Sci U S A* 2014; 111:E1648–55
134. Brown MT, Tan KR, O'Connor EC, Nikonenko I, Muller D, Lüscher C: Ventral tegmental area GABA projections pause accumbal cholinergic interneurons to enhance associative learning. *Nature* 2012; 492:452–6
135. Eban-Rothschild A, Borniger JC, Rothschild G, Giardino WJ, Morrow JG, de Lecea L: Arousal state-dependent alterations in VTA-GABAergic neuronal activity. *eNeuro* 2020; 7:ENEURO.0356–19.2020
136. Lee RS, Steffensen SC, Henriksen SJ: Discharge profiles of ventral tegmental area GABA neurons during movement, anesthesia, and the sleep–wake cycle. *J Neurosci* 2001; 21:1757–66
137. Yu X, Li W, Ma Y, Tossell K, Harris JJ, Harding EC, Ba W, Miracca G, Wang D, Li L, Guo J, Chen M, Li Y, Yustos R, Vyssotski AL, Burdakov D, Yang Q, Dong H, Franks NP, Wisden W: GABA and glutamate neurons in the VTA regulate sleep and wakefulness. *Nat Neurosci* 2019; 22:106–19
138. Franks NP: Molecular targets underlying general anaesthesia. *Br J Pharmacol* 2006; 147:S72–81
139. Melonakos ED, Moody OA, Nikolaeva K, Kato R, Nehs CJ, Solt K: Manipulating neural circuits in anesthesia research. *ANESTHESIOLOGY* 2020; 133:19–30
140. Moody OA, Zhang ER, Vincent KF, Kato R, Melonakos ED, Nehs CJ, Solt K: The neural circuits underlying general anesthesia and sleep. *Anesth Analg* 2021; 132:1254–64
141. Hunsley MS, Palmiter RD: Norepinephrine-deficient mice exhibit normal sleep–wake states but have shorter sleep latency after mild stress and low doses of amphetamine. *Sleep* 2003; 26:521–6
142. Hu FY, Hanna GM, Han W, Mardini F, Thomas SA, Wyner AJ, Kelz MB: Hypnotic hypersensitivity to volatile anesthetics and dexmedetomidine in dopamine  $\beta$ -hydroxylase knockout mice. *ANESTHESIOLOGY* 2012; 117:1006–17
143. Wisor JP, Nishino S, Sora I, Uhl GH, Mignot E, Edgar DM: Dopaminergic role in stimulant-induced wakefulness. *J Neurosci* 2001; 21:1787–94
144. Rhodes JA, Lane JM, Vlasac IM, Rutter MK, Czeisler CA, Saxena R: Association of DAT1 genetic variants with habitual sleep duration in the UK Biobank. *Sleep* 2018; 42:zsy193
145. McCann UD, Penetar DM, Shaham Y, Thorne DR, Sing HC, Thomas ML, Gillin JC, Belenky G: Effects of catecholamine depletion on alertness and mood

- in rested and sleep deprived normal volunteers. *Neuropsychopharmacology* 1993; 8:345–56
146. McCann UD, Thorne D, Hall M, Popp K, Avery W, Sing H, Thomas M, Belenky G: The effects of L-dihydroxyphenylalanine on alertness and mood in alpha-methyl-para-tyrosine-treated healthy humans: Further evidence for the role of catecholamines in arousal and anxiety. *Neuropsychopharmacology* 1995; 13:41–52
  147. Volkow ND, Tomasi D, Wang GJ, Telang F, Fowler JS, Logan J, Benveniste H, Kim R, Thanos PK, Ferré S: Evidence that sleep deprivation downregulates dopamine D2R in ventral striatum in the human brain. *J Neurosci* 2012; 32:6711–7
  148. Taylor NE, Chemali JJ, Brown EN, Solt K: Activation of D1 dopamine receptors induces emergence from isoflurane general anesthesia. *ANESTHESIOLOGY* 2013; 118:30–9
  149. Hyacinthe C, Barraud Q, Tison F, Bezard E, Ghorayeb I: D1 receptor agonist improves sleep–wake parameters in experimental parkinsonism. *Neurobiol Dis* 2014; 63:20–4
  150. Araki R, Hayashi K, Sawa T: Dopamine D2-receptor antagonist droperidol deepens sevoflurane anesthesia. *ANESTHESIOLOGY* 2018; 128:754–63
  151. Alkire MT, Haier RJ, Fallon JH: Toward a unified theory of narcosis: Brain imaging evidence for a thalamocortical switch as the neurophysiologic basis of anesthetic-induced unconsciousness. *Conscious Cogn* 2000; 9:370–86
  152. Arhem P, Klement G, Nilsson J: Mechanisms of anesthesia: Towards integrating network, cellular, and molecular level modeling. *Neuropsychopharmacology* 2003; 28:S40–7
  153. Palanca BJ, Mitra A, Larson-Prior L, Snyder AZ, Avidan MS, Raichle ME: Resting-state functional magnetic resonance imaging correlates of sevoflurane-induced unconsciousness. *ANESTHESIOLOGY* 2015; 123:346–56
  154. Akeju O, Loggia ML, Catana C, Pavone KJ, Vazquez R, Rhee J, Contreras Ramirez V, Chonde DB, Izquierdo-Garcia D, Arabasz G, Hsu S, Habeeb K, Hooker JM, Napadow V, Brown EN, Purdon PL: Disruption of thalamic functional connectivity is a neural correlate of dexmedetomidine-induced unconsciousness. *Elife* 2014; 3:e04499
  155. Breshears JD, Roland JL, Sharma M, Gaona CM, Freudenburg ZV, Tempelhoff R, Avidan MS, Leuthardt EC: Stable and dynamic cortical electrophysiology of induction and emergence with propofol anesthesia. *Proc Natl Acad Sci U S A* 2010; 107: 21170–5
  156. Krom AJ, Marmelshtein A, Gelbard-Sagiv H, Tankus A, Hayat H, Hayat D, Matot I, Strauss I, Fahoum F, Soehle M, Boström J, Mormann F, Fried I, Nir Y: Anesthesia-induced loss of consciousness disrupts auditory responses beyond primary cortex. *Proc Natl Acad Sci U S A* 2020; 117:11770–80
  157. Carspecken CW, Chanprasert S, Kalume F, Sedensky MM, Morgan PG: Anesthetics have different effects on the electrocorticographic spectra of wild-type and mitochondrial mutant mice. *ANESTHESIOLOGY* 2018; 129:744–55
  158. Ching S, Brown EN: Modeling the dynamical effects of anesthesia on brain circuits. *Curr Opin Neurobiol* 2014; 25:116–22
  159. Whalen TC, Willard AM, Rubin JE, Gittis AH: Delta oscillations are a robust biomarker of dopamine depletion severity and motor dysfunction in awake mice. *J Neurophysiol* 2020; 124:312–29
  160. Mashour GA, Palanca BJ, Basner M, Li D, Wang W, Blain-Moraes S, Lin N, Maier K, Muench M, Tarnal V, Vanini G, Ochroch EA, Hogg R, Schwartz M, Maybrier H, Hardie R, Janke E, Golmirzaie G, Picton P, McKinstry-Wu AR, Avidan MS, Kelz MB: Recovery of consciousness and cognition after general anesthesia in humans. *Elife* 2021; 10:e59525
  161. Shortal BP, Hickman LB, Mak-McCully RA, Wang W, Brennan C, Ung H, Litt B, Tarnal V, Janke E, Picton P, Blain-Moraes S, Maybrier HR, Muench MR, Lin N, Avidan MS, Mashour GA, McKinstry-Wu AR, Kelz MB, Palanca BJ, Proekt A; ReCCognition Study Group: Duration of EEG suppression does not predict recovery time or degree of cognitive impairment after general anaesthesia in human volunteers. *Br J Anaesth* 2019; 123:206–18
  162. Wildes TS, Mickle AM, Ben Abdallah A, Maybrier HR, Oberhaus J, Budelier TP, Kronzer A, McKinnon SL, Park D, Torres BA, Graetz TJ, Emmert DA, Palanca BJ, Goswami S, Jordan K, Lin N, Fritz BA, Stevens TW, Jacobsohn E, Schmitt EM, Inouye SK, Stark S, Lenze EJ, Avidan MS; ENGAGES Research Group: Effect of electroencephalography-guided anesthetic administration on postoperative delirium among older adults undergoing major surgery: The ENGAGES randomized clinical trial. *JAMA* 2019; 321:473–83
  163. Breton-Provencher V, Sur M: Active control of arousal by a locus coeruleus GABAergic circuit. *Nat Neurosci* 2019; 22:218–28
  164. Dickinson R, White I, Lieb WR, Franks NP: Stereoselective loss of righting reflex in rats by isoflurane. *ANESTHESIOLOGY* 2000; 93:837–43
  165. McCarren HS, Moore JT, Kelz MB: Assessing changes in volatile general anesthetic sensitivity of mice after local or systemic pharmacological intervention. *J Vis Exp* 2013:e51079
  166. Rudolph U, Antkowiak B: Molecular and neuronal substrates for general anaesthetics. *Nat Rev Neurosci* 2004; 5:709–20
  167. Campagna JA, Forman SA: Mechanisms of actions of inhaled anesthetics. *N Engl J Med* 2003; 348:2110–24

168. Snyder GL, Galdi S, Hendrick JP, Hemmings HC Jr: General anesthetics selectively modulate glutamatergic and dopaminergic signaling via site-specific phosphorylation *in vivo*. *Neuropharmacology* 2007; 53:619–30
169. Nagata I, Sasaki M, Miyazaki T, Saeki K, Ogawa K, Kamiya Y: Subanesthetic dose of propofol activates the reward system in rats. *Anesth Analg* 2021 [Epub ahead of print]
170. Jones SR, Gainetdinov RR, Wightman RM, Caron MG: Mechanisms of amphetamine action revealed in mice lacking the dopamine transporter. *J Neurosci* 1998; 18:1979–86
171. Chemali JJ, Van Dort CJ, Brown EN, Solt K: Active emergence from propofol general anesthesia is induced by methylphenidate. *ANESTHESIOLOGY* 2012; 116:998–1005
172. Solt K, Cotten JF, Cimenser A, Wong KF, Chemali JJ, Brown EN: Methylphenidate actively induces emergence from general anesthesia. *ANESTHESIOLOGY* 2011; 115:791–803
173. Kenny JD, Chemali JJ, Cotten JF, Van Dort CJ, Kim SE, Ba D, Taylor NE, Brown EN, Solt K: Physostigmine and methylphenidate induce distinct arousal states during isoflurane general anesthesia in rats. *Anesth Analg* 2016; 123:1210–9
174. Kenny JD, Taylor NE, Brown EN, Solt K: Dextroamphetamine (but not atomoxetine) induces reanimation from general anesthesia: Implications for the roles of dopamine and norepinephrine in active emergence. *PLoS One* 2015; 10:e0131914
175. Fong R, Khokhar S, Chowdhury AN, Xie KG, Wong JH, Fox AP, Xie Z: Caffeine accelerates recovery from general anesthesia via multiple pathways. *J Neurophysiol* 2017; 118:1591–7
176. Fox AP, Wagner KR, Towle VL, Xie KG, Xie Z: Caffeine reverses the unconsciousness produced by light anesthesia in the continued presence of isoflurane in rats. *PLoS One* 2020; 15:e0241818
177. Wang Q, Fong R, Mason P, Fox AP, Xie Z: Caffeine accelerates recovery from general anesthesia. *J Neurophysiol* 2014; 111:1331–40
178. Fong R, Wang L, Zaczyn JP, Khokhar S, Apfelbaum JL, Fox AP, Xie Z: Caffeine accelerates emergence from isoflurane anesthesia in humans: A randomized, double-blind, crossover study. *ANESTHESIOLOGY* 2018; 129:912–20
179. Horita A, Carino MA, Nishimura Y: D1 agonist SKF 38393 antagonizes pentobarbital-induced narcosis and depression of hippocampal and cortical cholinergic activity in rats. *Life Sci* 1991; 49:595–601
180. Benveniste H, Volkow ND: Dopamine-enhancing medications to accelerate emergence from general anesthesia. *ANESTHESIOLOGY* 2013; 118:5–6
181. Horita A, Carino MA: D-1 agonist, SKF 38393, but not a D-2 agonist, produces a cholinergically mediated analeptic effect in rabbits. *Pharmacol Biochem Behav* 1991; 39:449–52
182. Chen L, Li S, Zhou Y, Liu T, Cai A, Zhang Z, Xu F, Manyande A, Wang J, Peng M: Neuronal mechanisms of adenosine A2A receptors in the loss of consciousness induced by propofol general anesthesia with functional magnetic resonance imaging. *J Neurochem* 2021; 156:1020–32
183. Redinbaugh MJ, Phillips JM, Kambi NA, Mohanta S, Andryk S, Dooley GL, Afrasiabi M, Raz A, Saalman YB: Thalamus modulates consciousness via layer-specific control of cortex. *Neuron* 2020; 106:66–75.e12
184. Bastos AM, Donoghue JA, Brincat SL, Mahnke M, Yanar J, Correa J, Waite AS, Lundqvist M, Roy J, Brown EN, Miller EK: Neural effects of propofol-induced unconsciousness and its reversal using thalamic stimulation. *Elife* 2021; 10:e60824
185. Ballesteros JJ, Briscoe JB, Ishizawa Y: Neural signatures of  $\alpha$ 2-adrenergic agonist-induced unconsciousness and awakening by antagonist. *Elife* 2020; 9:e57670
186. Ao Y, Yang B, Zhang C, Wu B, Zhang X, Xing D, Xu H: Locus coeruleus to paraventricular thalamus projections facilitate emergence from isoflurane anesthesia in mice. *Front Pharmacol* 2021; 12:643172
187. Ramadasan-Nair R, Hui J, Itsara LS, Morgan PG, Sedensky MM: Mitochondrial function in astrocytes is essential for normal emergence from anesthesia in mice. *ANESTHESIOLOGY* 2019; 130:423–34
188. Boyden ES, Zhang F, Bamberg E, Nagel G, Deisseroth K: Millisecond-timescale, genetically targeted optical control of neural activity. *Nat Neurosci* 2005; 8:1263–8
189. Li X, Gutierrez DV, Hanson MG, Han J, Mark MD, Chiel H, Hegemann P, Landmesser LT, Herlitze S: Fast noninvasive activation and inhibition of neural and network activity by vertebrate rhodopsin and green algae channelrhodopsin. *Proc Natl Acad Sci U S A* 2005; 102:17816–21
190. Nagel G, Ollig D, Fuhrmann M, Kateriya S, Musti AM, Bamberg E, Hegemann P: Channelrhodopsin-1: A light-gated proton channel in green algae. *Science* 2002; 296:2395–8
191. Copits BA, Gowrishankar R, O'Neill PR, Li JN, Girven KS, Yoo JJ, Meshik X, Parker KE, Spangler SM, Elerding AJ, Brown BJ, Shirley SE, Ma KKL, Vasquez AM, Stander MC, Kalyanaraman V, Vogt SK, Samineni VK, Patriarchi T, Tian L, Gautam N, Sunahara RK, Gereau RW 4th, Bruchas MR: A photoswitchable GPCR-based opsin for presynaptic inhibition. *Neuron* 2021; 109:1791–809.e11
192. Siuda ER, McCall JG, Al-Hasani R, Shin G, Il Park S, Schmidt MJ, Anderson SL, Planer WJ, Rogers JA, Bruchas MR: Optodynamic simulation of  $\beta$ -adrenergic receptor signalling. *Nat Commun* 2015; 6:article8480



193. Spangler SM, Bruchas MR: Optogenetic approaches for dissecting neuromodulation and GPCR signaling in neural circuits. *Curr Opin Pharmacol* 2017; 32:56–70
194. Patriarchi T, Cho JR, Merten K, Howe MW, Marley A, Xiong W-H, Folk RW, Broussard GJ, Liang R, Jang MJ, Zhong H, Dombeck D, Zastrow M von, Nimmerjahn A, Gradinaru V, Williams JT, Tian L: Ultrafast neuronal imaging of dopamine dynamics with designed genetically encoded sensors. *Science* 2018; 360:eaat4422
195. Feng J, Zhang C, Lischinsky JE, Jing M, Zhou J, Wang H, Zhang Y, Dong A, Wu Z, Wu H, Chen W, Zhang P, Zou J, Hires SA, Zhu JJ, Cui G, Lin D, Du J, Li Y: A genetically encoded fluorescent sensor for rapid and specific *in vivo* detection of norepinephrine. *Neuron* 2019; 102:745–61.e8
196. Sabatini BL, Tian L: Imaging neurotransmitter and neuromodulator dynamics *in vivo* with genetically encoded indicators. *Neuron* 2020; 108:17–32
197. Jeong JW, McCall JG, Shin G, Zhang Y, Al-Hasani R, Kim M, Li S, Sim JY, Jang KI, Shi Y, Hong DY, Liu Y, Schmitz GP, Xia L, He Z, Gamble P, Ray WZ, Huang Y, Bruchas MR, Rogers JA: Wireless optofluidic systems for programmable *in vivo* pharmacology and optogenetics. *Cell* 2015; 162:662–74
198. Lu L, Gutruf P, Xia L, Bhatti DL, Wang X, Vazquez-Guardado A, Ning X, Shen X, Sang T, Ma R, Pakeltis G, Sobczak G, Zhang H, Seo DO, Xue M, Yin L, Chanda D, Sheng X, Bruchas MR, Rogers JA: Wireless optoelectronic photometers for monitoring neuronal dynamics in the deep brain. *Proc Natl Acad Sci U S A* 2018; 115:E1374–83
199. Qazi R, Gomez AM, Castro DC, Zou Z, Sim JY, Xiong Y, Abdo J, Kim CY, Anderson A, Lohner F, Byun SH, Chul Lee B, Jang KI, Xiao J, Bruchas MR, Jeong JW: Wireless optofluidic brain probes for chronic neuropharmacology and photostimulation. *Nat Biomed Eng* 2019; 3:655–69
200. Zhang Y, Castro DC, Han Y, Wu Y, Guo H, Weng Z, Xue Y, Ausra J, Wang X, Li R, Wu G, Vazquez-Guardado A, Xie Y, Xie Z, Ostojich D, Peng D, Sun R, Wang B, Yu Y, Leshock JP, Qu S, Su CJ, Shen W, Hang T, Banks A, Huang Y, Radulovic J, Gutruf P, Bruchas MR, Rogers JA: Battery-free, lightweight, injectable microsystem for *in vivo* wireless pharmacology and optogenetics. *Proc Natl Acad Sci U S A* 2019; 116:21427–37
201. Gowrishankar R, Bruchas MR: Defining circuit-specific roles for G protein-coupled receptors in aversive learning. *Curr Opin Behav Sci* 2019; 26:146–56
202. Renier N, Adams EL, Kirst C, Wu Z, Azevedo R, Kohl J, Autry AE, Kadiri L, Umadevi Venkataraju K, Zhou Y, Wang VX, Tang CY, Olsen O, Dulac C, Osten P, Tessier-Lavigne M: Mapping of brain activity by automated volume analysis of immediate early genes. *Cell* 2016; 165:1789–802
203. Gao S, Proekt A, Renier N, Calderon DP, Pfaff DW: Activating an anterior nucleus gigantocellularis subpopulation triggers emergence from pharmacologically-induced coma in rodents. *Nat Commun* 2019; 10:2897
204. Ghosh KK, Burns LD, Cocker ED, Nimmerjahn A, Ziv Y, Gamal AE, Schnitzer MJ: Miniaturized integration of a fluorescence microscope. *Nat Methods* 2011; 8:871–8
205. Rodriguez-Romaguera J, Ung RL, Nomura H, Otis JM, Basiri ML, Namboodiri VMK, Zhu X, Robinson JE, van den Munkhof HE, McHenry JA, Eckman LEH, Kosyk O, Zhou TC, Kash TL, Bruchas MR, Stuber GD: Prepronociceptin-expressing neurons in the extended amygdala encode and promote rapid arousal responses to motivationally salient stimuli. *Cell Rep* 2020; 33:108362
206. Aharoni D, Hoogland TM: Circuit investigations with open-source miniaturized microscopes: Past, present and future. *Front Cell Neurosci* 2019; 13:141
207. Cai DJ, Aharoni D, Shuman T, Shobe J, Biane J, Song W, Wei B, Veshkini M, La-Vu M, Lou J, Flores SE, Kim I, Sano Y, Zhou M, Baumgaertel K, Lavi A, Kamata M, Tuszyński M, Mayford M, Golshani P, Silva AJ: A shared neural ensemble links distinct contextual memories encoded close in time. *Nature* 2016; 534:115–8
208. Scheinin A, Kantonen O, Alkire M, Långsjö J, Kallionpää RE, Kaisti K, Radek L, Johansson J, Sandman N, Nyman M, Scheinin M, Vahlberg T, Revonsuo A, Valli K, Scheinin H: Foundations of human consciousness: Imaging the twilight zone. *J Neurosci* 2021; 41:1769–78
209. Voss HU, Schiff ND: MRI of neuronal network structure, function, and plasticity. *Prog Brain Res* 2009; 175:483–96
210. Steinmetz NA, Koch C, Harris KD, Carandini M: Challenges and opportunities for large-scale electrophysiology with Neuropixels probes. *Curr Opin Neurobiol* 2018; 50:92–100
211. Datta SR, Anderson DJ, Branson K, Perona P, Leifer A: Computational neuroethology: A call to action. *Neuron* 2019; 104:11–24
212. Scangos KW, Khambhati AN, Daly PM, Makhoul GS, Sugrue LP, Zamanian H, Liu TX, Rao VR, Sellers KK, Dawes HE, Starr PA, Krystal AD, Chang EF: Closed-loop neuromodulation in an individual with treatment-resistant depression. *Nat Med* 2021; 27:1696–700
213. Nath T, Mathis A, Chen AC, Patel A, Bethge M, Mathis MW: Using DeepLabCut for 3D markerless

- pose estimation across species and behaviors. *Nat Protoc* 2019; 14:2152–76
214. Nilsson SR, Goodwin NL, Choong JJ, Hwang S, Wright HR, Norville ZC, Tong X, Lin D, Bentzley BS, Eshel N, McLaughlin RJ, Golden SA: Simple behavioral analysis (SimBA): An open source toolkit for computer classification of complex social behaviors in experimental animals. Available at <https://github.com/sgoldenlab/simba>. Accessed February 22, 2022.
  215. Coffey KR, Marx RG, Neumaier JF: DeepSqueak: A deep learning-based system for detection and analysis of ultrasonic vocalizations. *Neuropsychopharmacology* 2019; 44:859–68
  216. Geuther BQ, Peer A, He H, Sabnis G, Philip VM, Kumar V: Action detection using a neural network elucidates the genetics of mouse grooming behavior. *Elife* 2021; 10:e63207
  217. Wiltchko AB, Tsukahara T, Zeine A, Anyoha R, Gillis WF, Markowitz JE, Peterson RE, Katon J, Johnson MJ, Datta SR: Revealing the structure of pharmacobehavioral space through motion sequencing. *Nat Neurosci* 2020; 23:1433–43
  218. Gao S, Calderon DP: Robust alternative to the righting reflex to assess arousal in rodents. *Sci Rep* 2020; 10:20280
  219. Ramaswamy SM, Kuizenga MH, Weerink MAS, Vereecke HEM, Struys MMRF, Nagaraj SB: Novel drug-independent sedation level estimation based on machine learning of quantitative frontal electroencephalogram features in healthy volunteers. *Br J Anaesth* 2019; 123:479–87
  220. Dubost C, Humbert P, Oudre L, Labourdette C, Vayatis N, Vidal PP: Quantitative assessment of consciousness during anesthesia without EEG data. *J Clin Monit Comput* 2021; 35:993–1005
  221. Guenther CJ, Miyamichi K, Yang HH, Heller HC, Luo L: Permanent genetic access to transiently active neurons via TRAP: Targeted recombination in active populations. *Neuron* 2013; 78:773–84
  222. DeNardo LA, Liu CD, Allen WE, Adams EL, Friedmann D, Fu L, Guenther CJ, Tessier-Lavigne M, Luo L: Temporal evolution of cortical ensembles promoting remote memory retrieval. *Nat Neurosci* 2019; 22:460–9
  223. Ghandour K, Ohkawa N, Fung CCA, Asai H, Saitoh Y, Takekawa T, Okubo-Suzuki R, Soya S, Nishizono H, Matsuo M, Osanai M, Sato M, Ohkura M, Nakai J, Hayashi Y, Sakurai T, Kitamura T, Fukai T, Inokuchi K: Orchestrated ensemble activities constitute a hippocampal memory engram. *Nat Commun* 2019; 10:2637
  224. DeNardo L, Luo L: Genetic strategies to access activated neurons. *Curr Opin Neurobiol* 2017; 45:121–9
